# Supplementary material for: The Tandem Repeats Enabling Reversible Switching between the Two Phases of β-Lactamase Substrate Spectrum
Source: PubMed Central journal article supplement (PMC4169377; doi:10.1371/journal.pgen.1004640), 2014-09-18

Figure S3. SCSs-TRs and direct repeats-TRs correlations in bacterial genera

A. SCSs-TRs correlations and the GC contents in bacterial genera

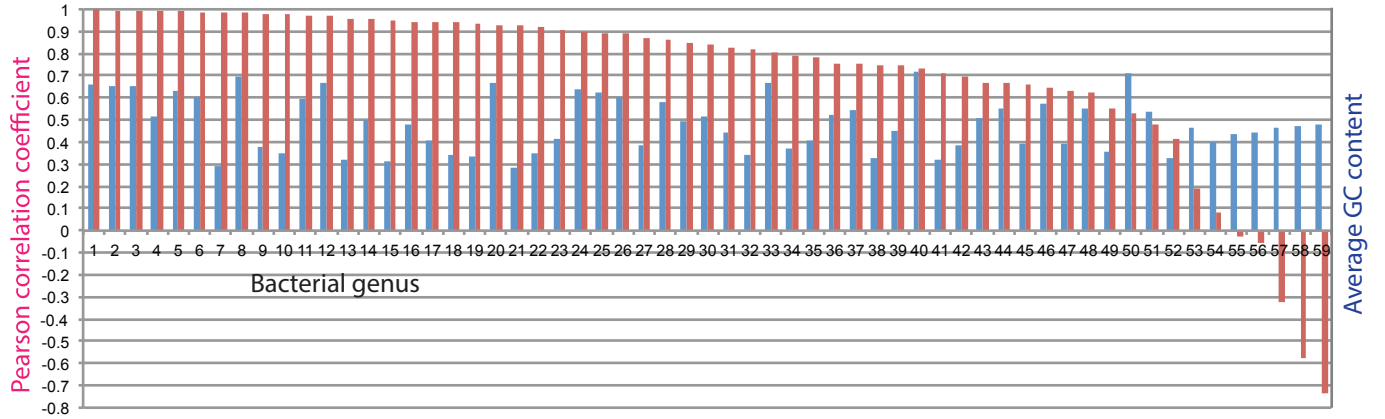

Bacterial genus

|    |                   |    |                                 |    |                    |
|----|-------------------|----|---------------------------------|----|--------------------|
| 1  | Bordetella        | 11 | Corynebacterium                 | 21 | Borrelia           |
| 2  | Propionibacterium | 12 | Acidovorax                      | 22 | Thermoanaerobacter |
| 3  | Burkholderia      | 13 | Rickettsia                      | 23 | Lactobacillus      |
| 4  | Serratia          | 14 | Paenibacillus                   | 24 | Xanthomonas        |
| 5  | Arthrobacter      | 15 | Candidatus Kinetoplastibacteriu | 25 | Pseudomonas        |
| 6  | Desulfovibrio     | 16 | Treponema                       | 26 | Bifidobacterium    |
| 7  | Mycoplasma        | 17 | Bacillus                        | 27 | Bartonella         |
| 8  | Methylobacterium  | 18 | Clostridium                     | 28 | Geobacter          |
| 9  | Leuconostoc       | 19 | Staphylococcus                  | 29 | Geobacillus        |
| 10 | Campylobacter     | 20 | Deinococcus                     | 30 | Chlorobium         |
| 31 | Pyrococcus        | 41 | Methanocaldococcus              | 51 | Erwinia            |
| 32 | Wolbachia         | 42 | Haemophilus                     | 52 | Flavobacterium     |
| 33 | Mycobacterium     | 43 | Thermococcus                    | 53 | Desulfotomaculum   |
| 34 | Listeria          | 44 | Synechococcus                   | 54 | Chlamydomphila     |
| 35 | Cyanothece        | 45 | Helicobacter                    | 55 | Bacteroides        |
| 36 | Spirochaeta       | 46 | Brucella                        | 56 | Thermotoga         |
| 37 | Enterobacter      | 47 | Streptococcus                   | 57 | Shewanella         |
| 38 | Francisella       | 48 | Pyrobaculum                     | 58 | Dehalococcoides    |
| 39 | Vibrio            | 49 | Caldicellulosiruptor            | 59 | Prevotella         |
| 40 | Streptomyces      | 50 | Frankia                         |    |                    |

B. SCSs-TRs correlation in each bacterial genus

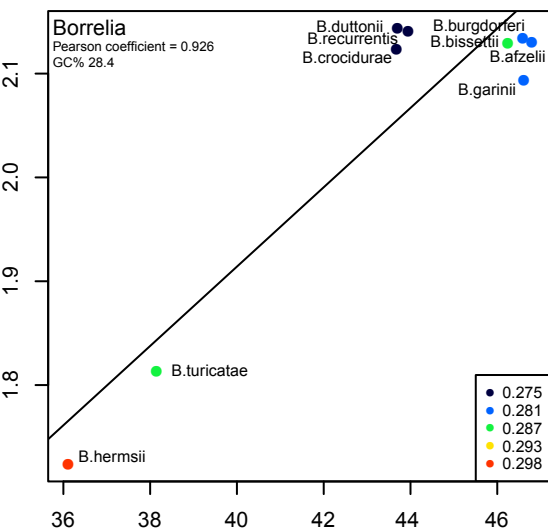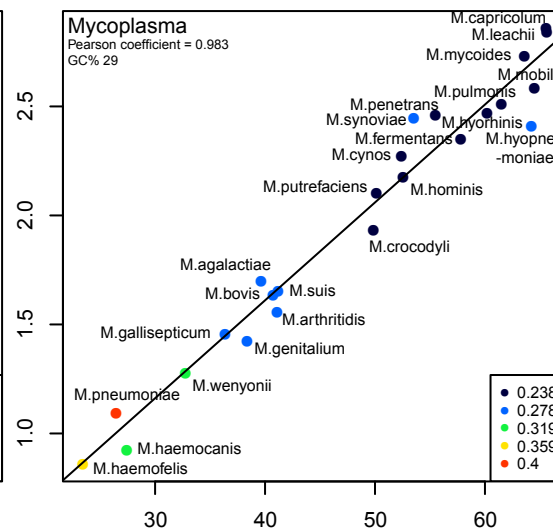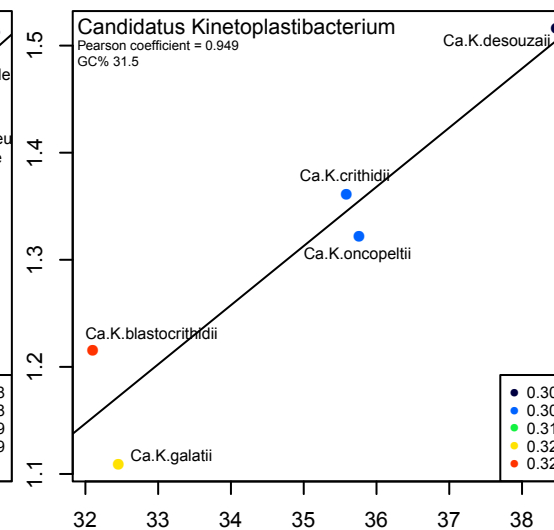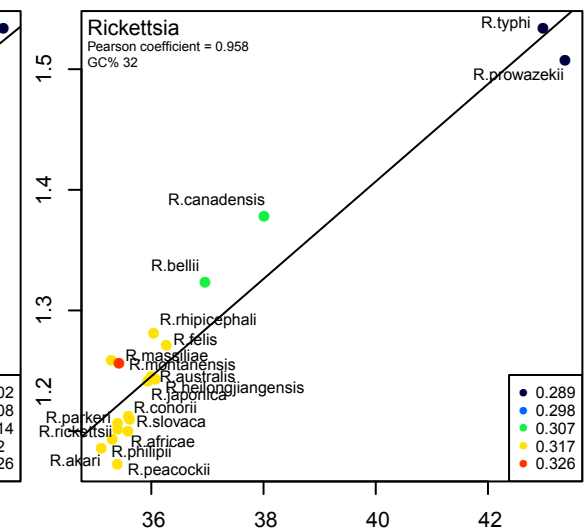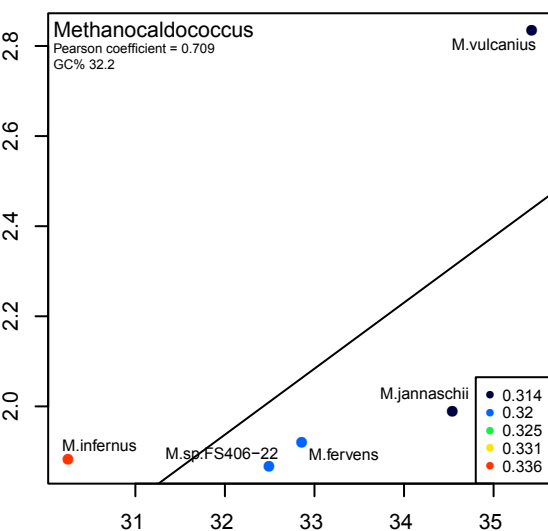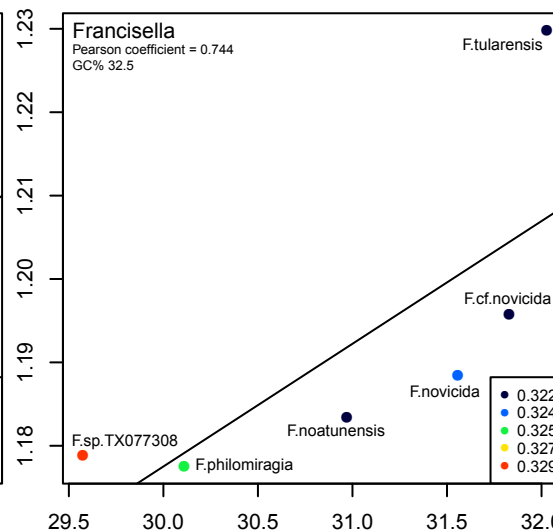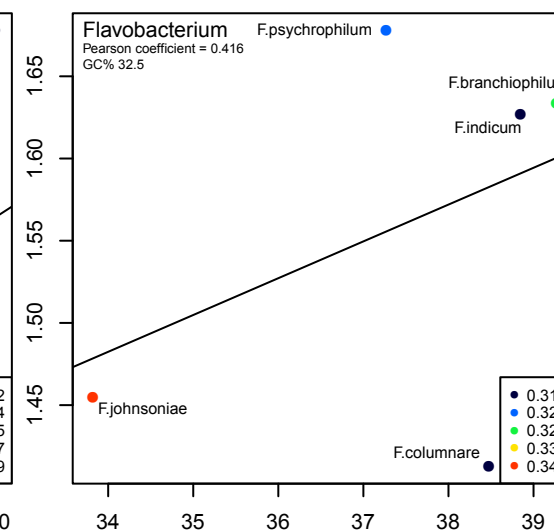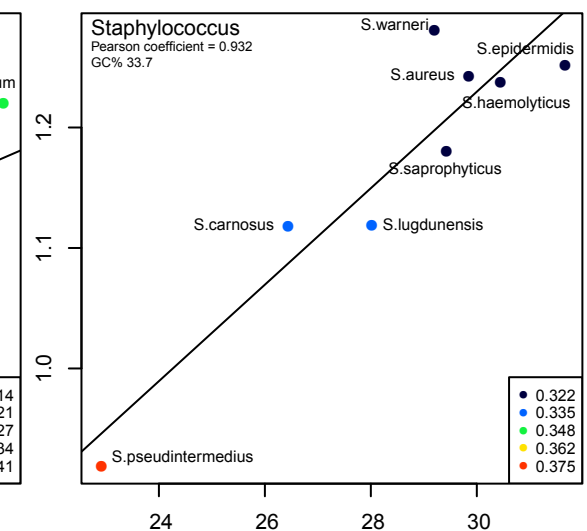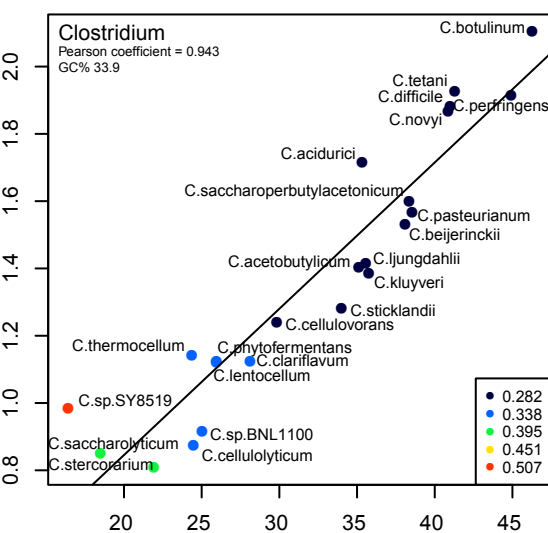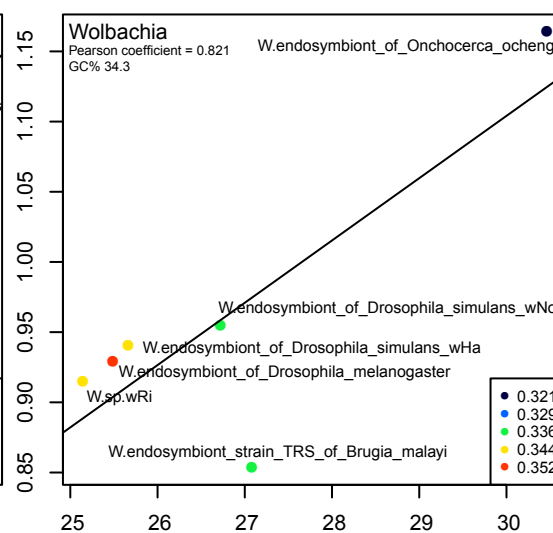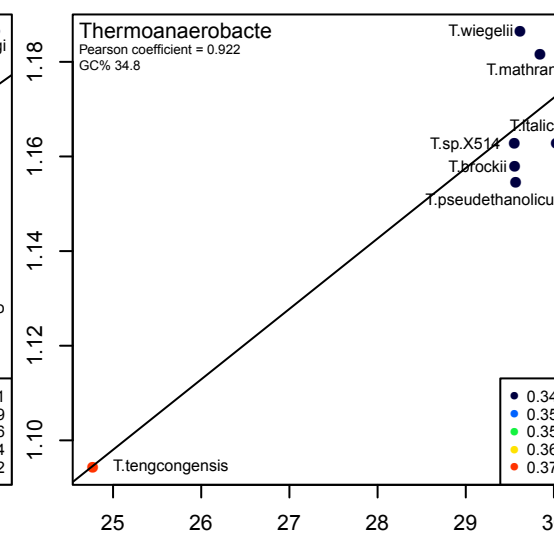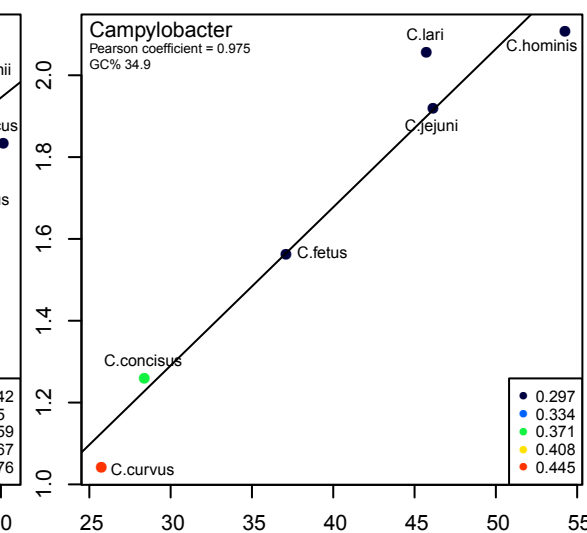

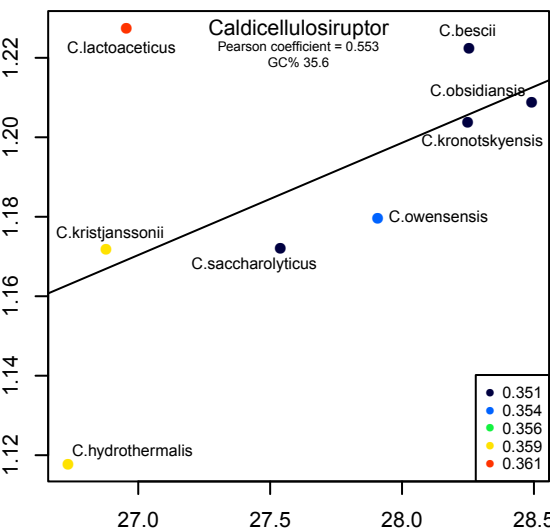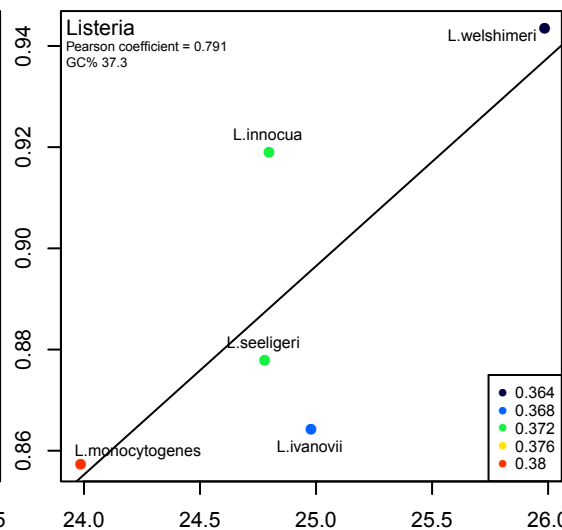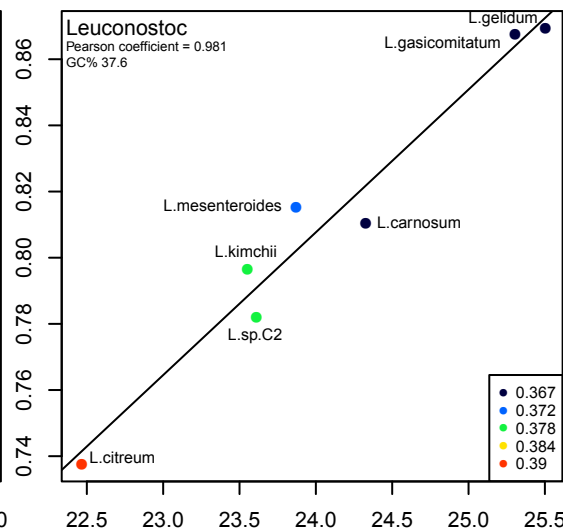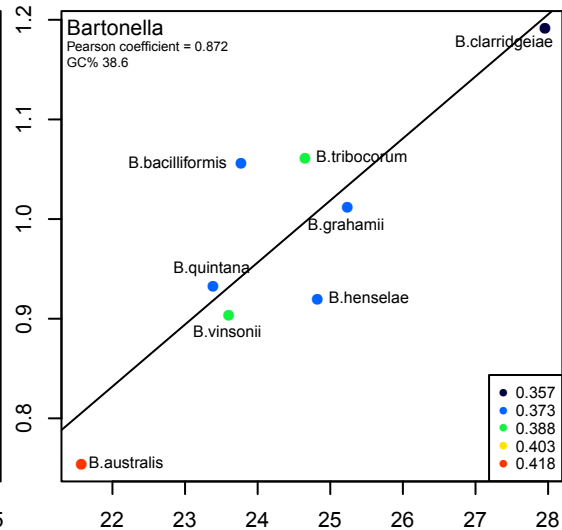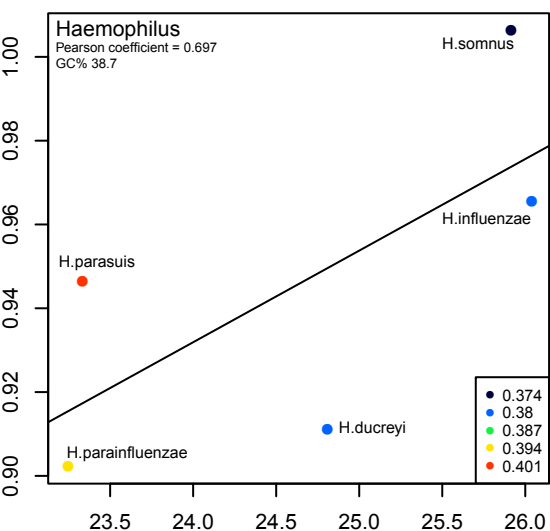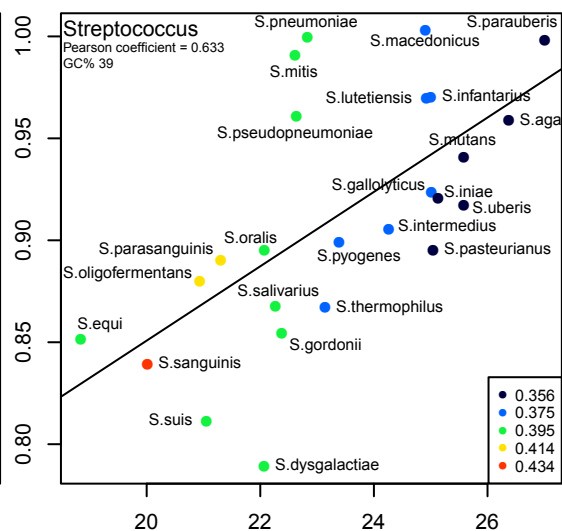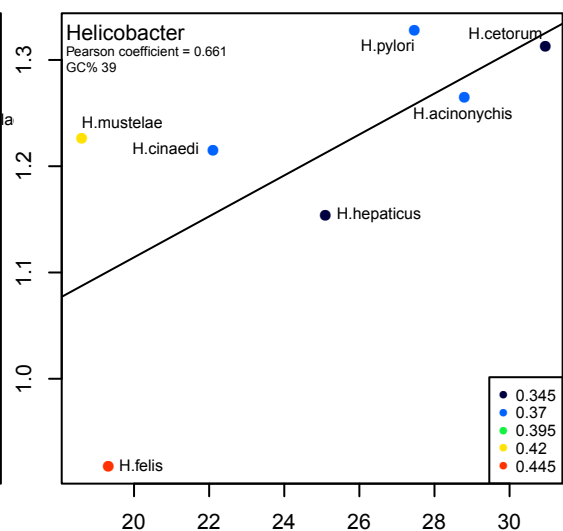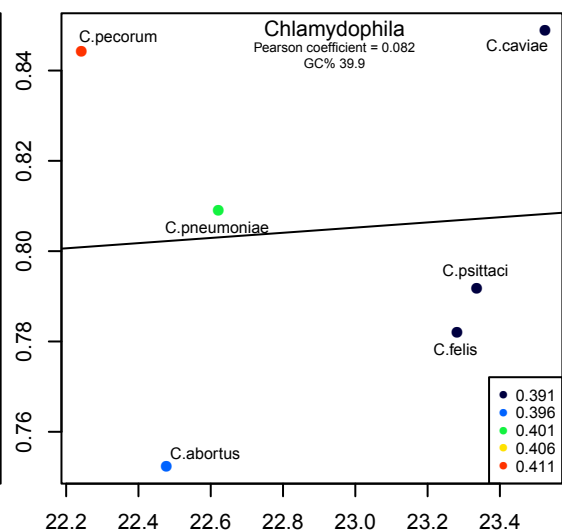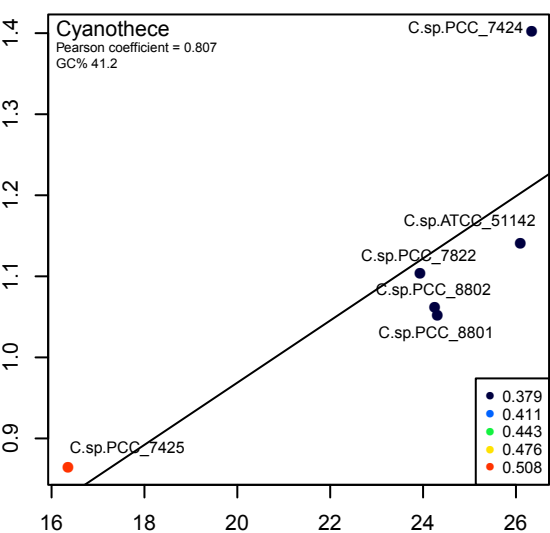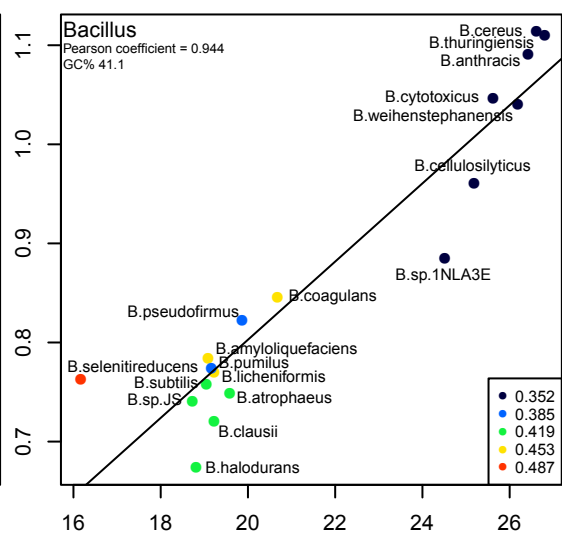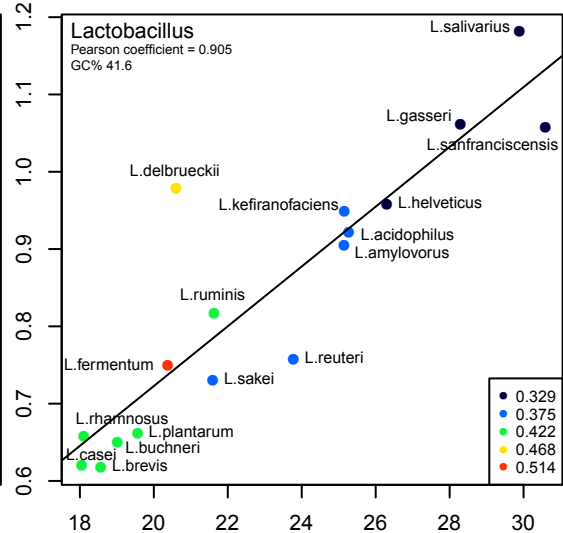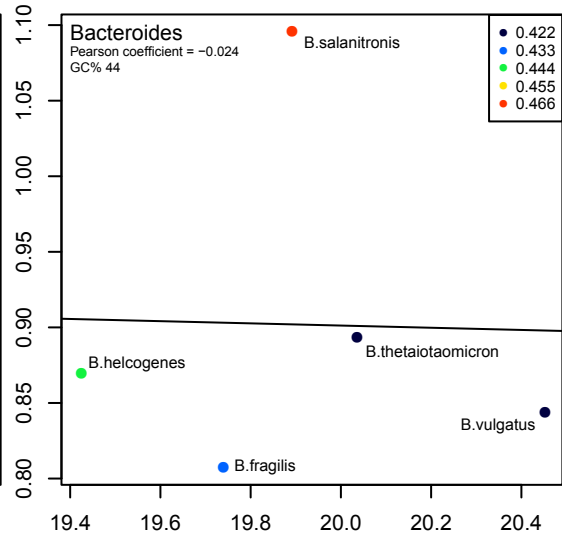

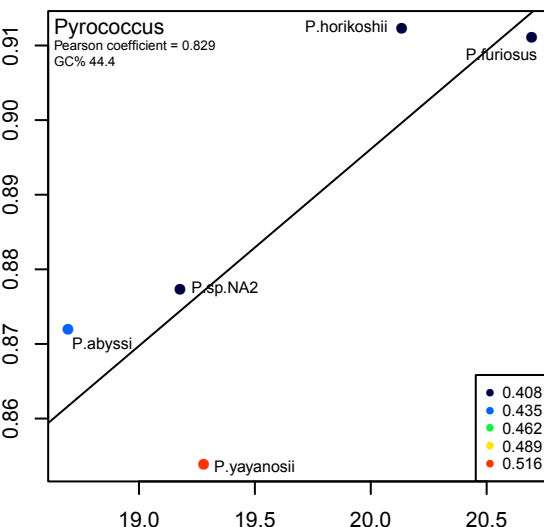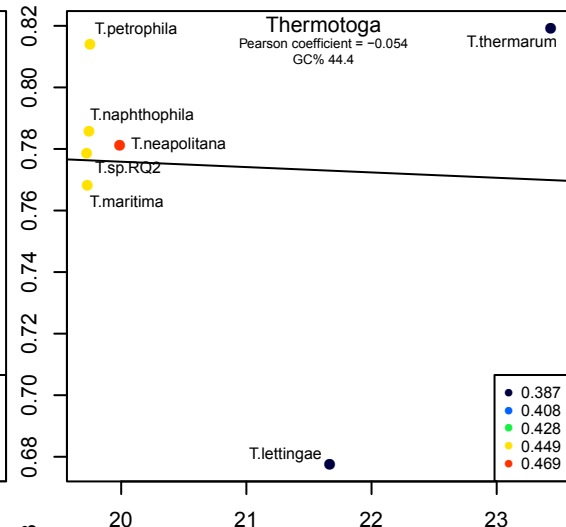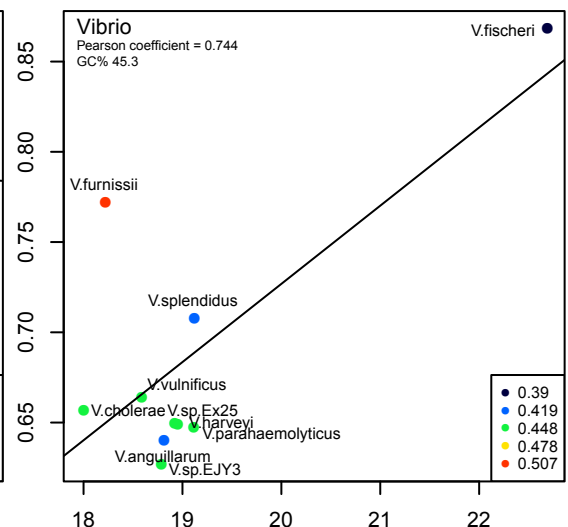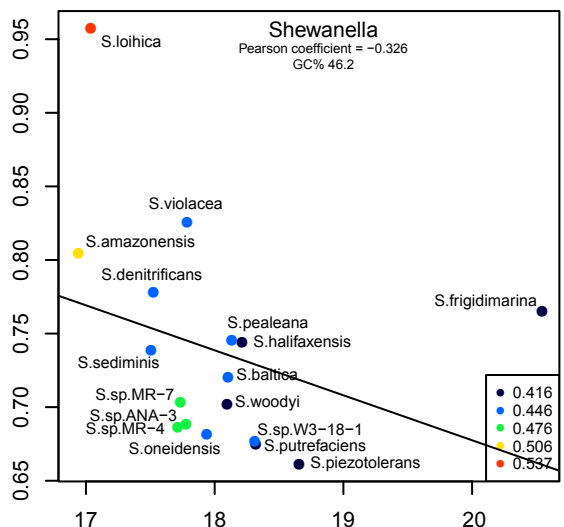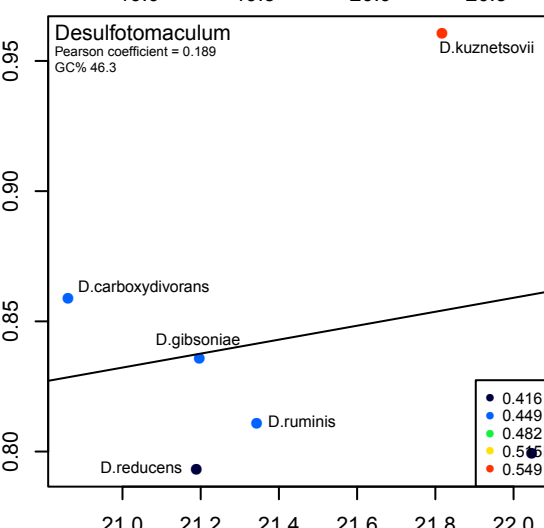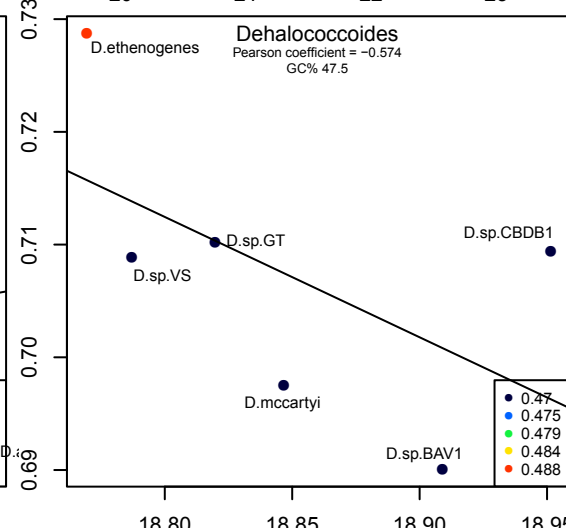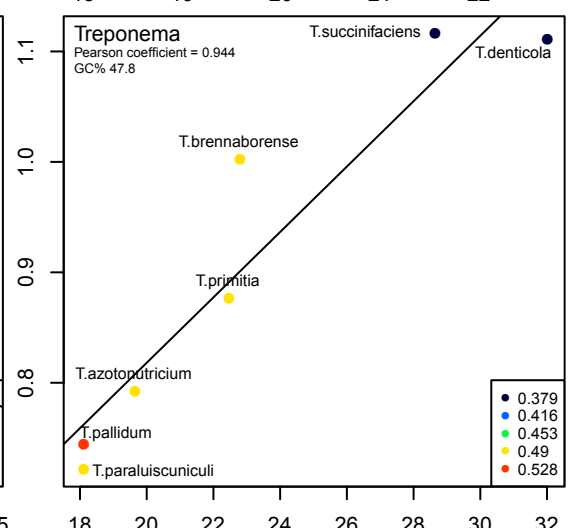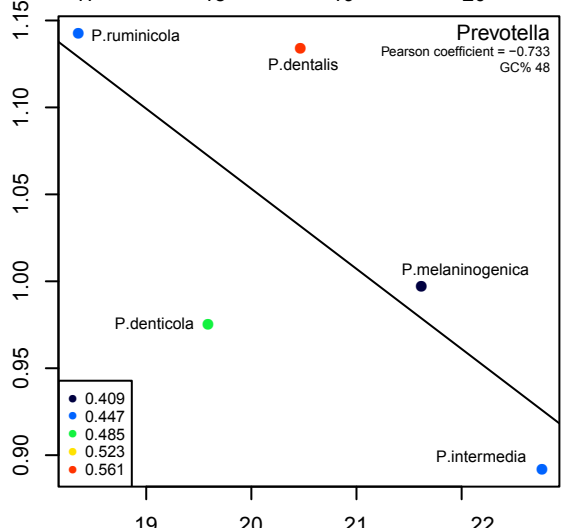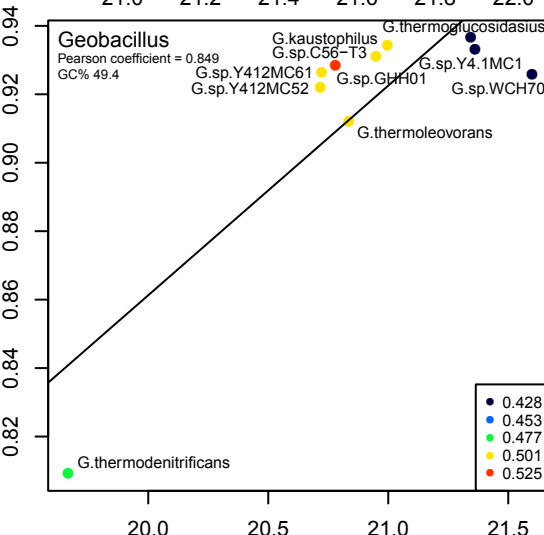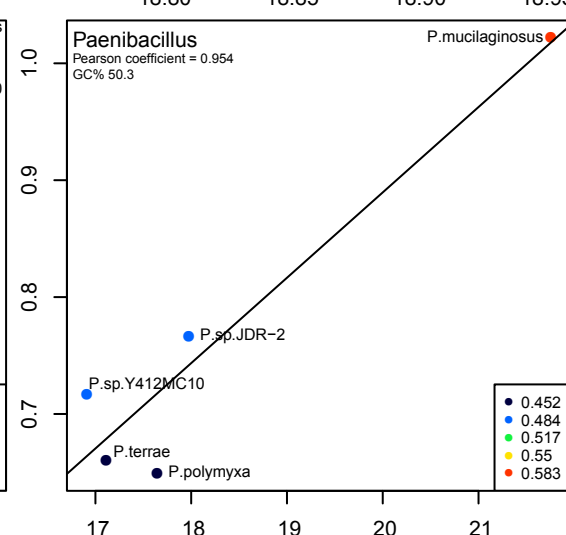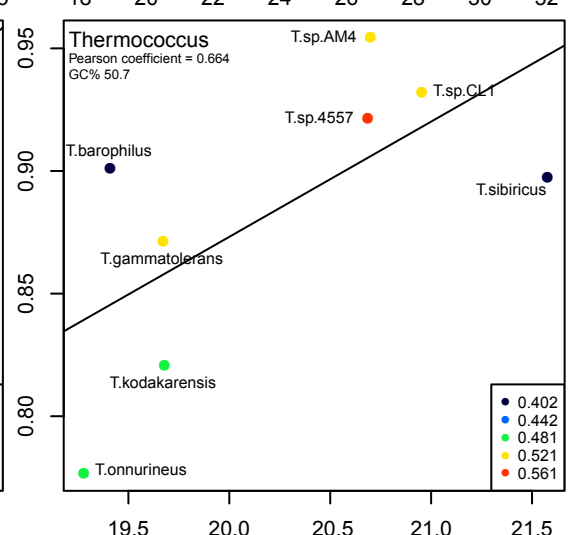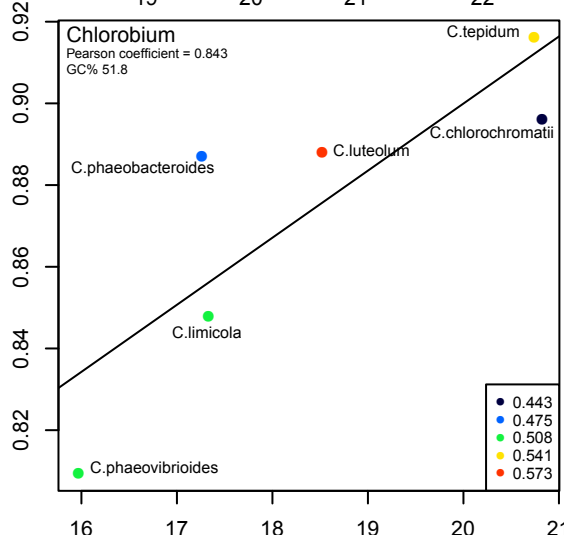

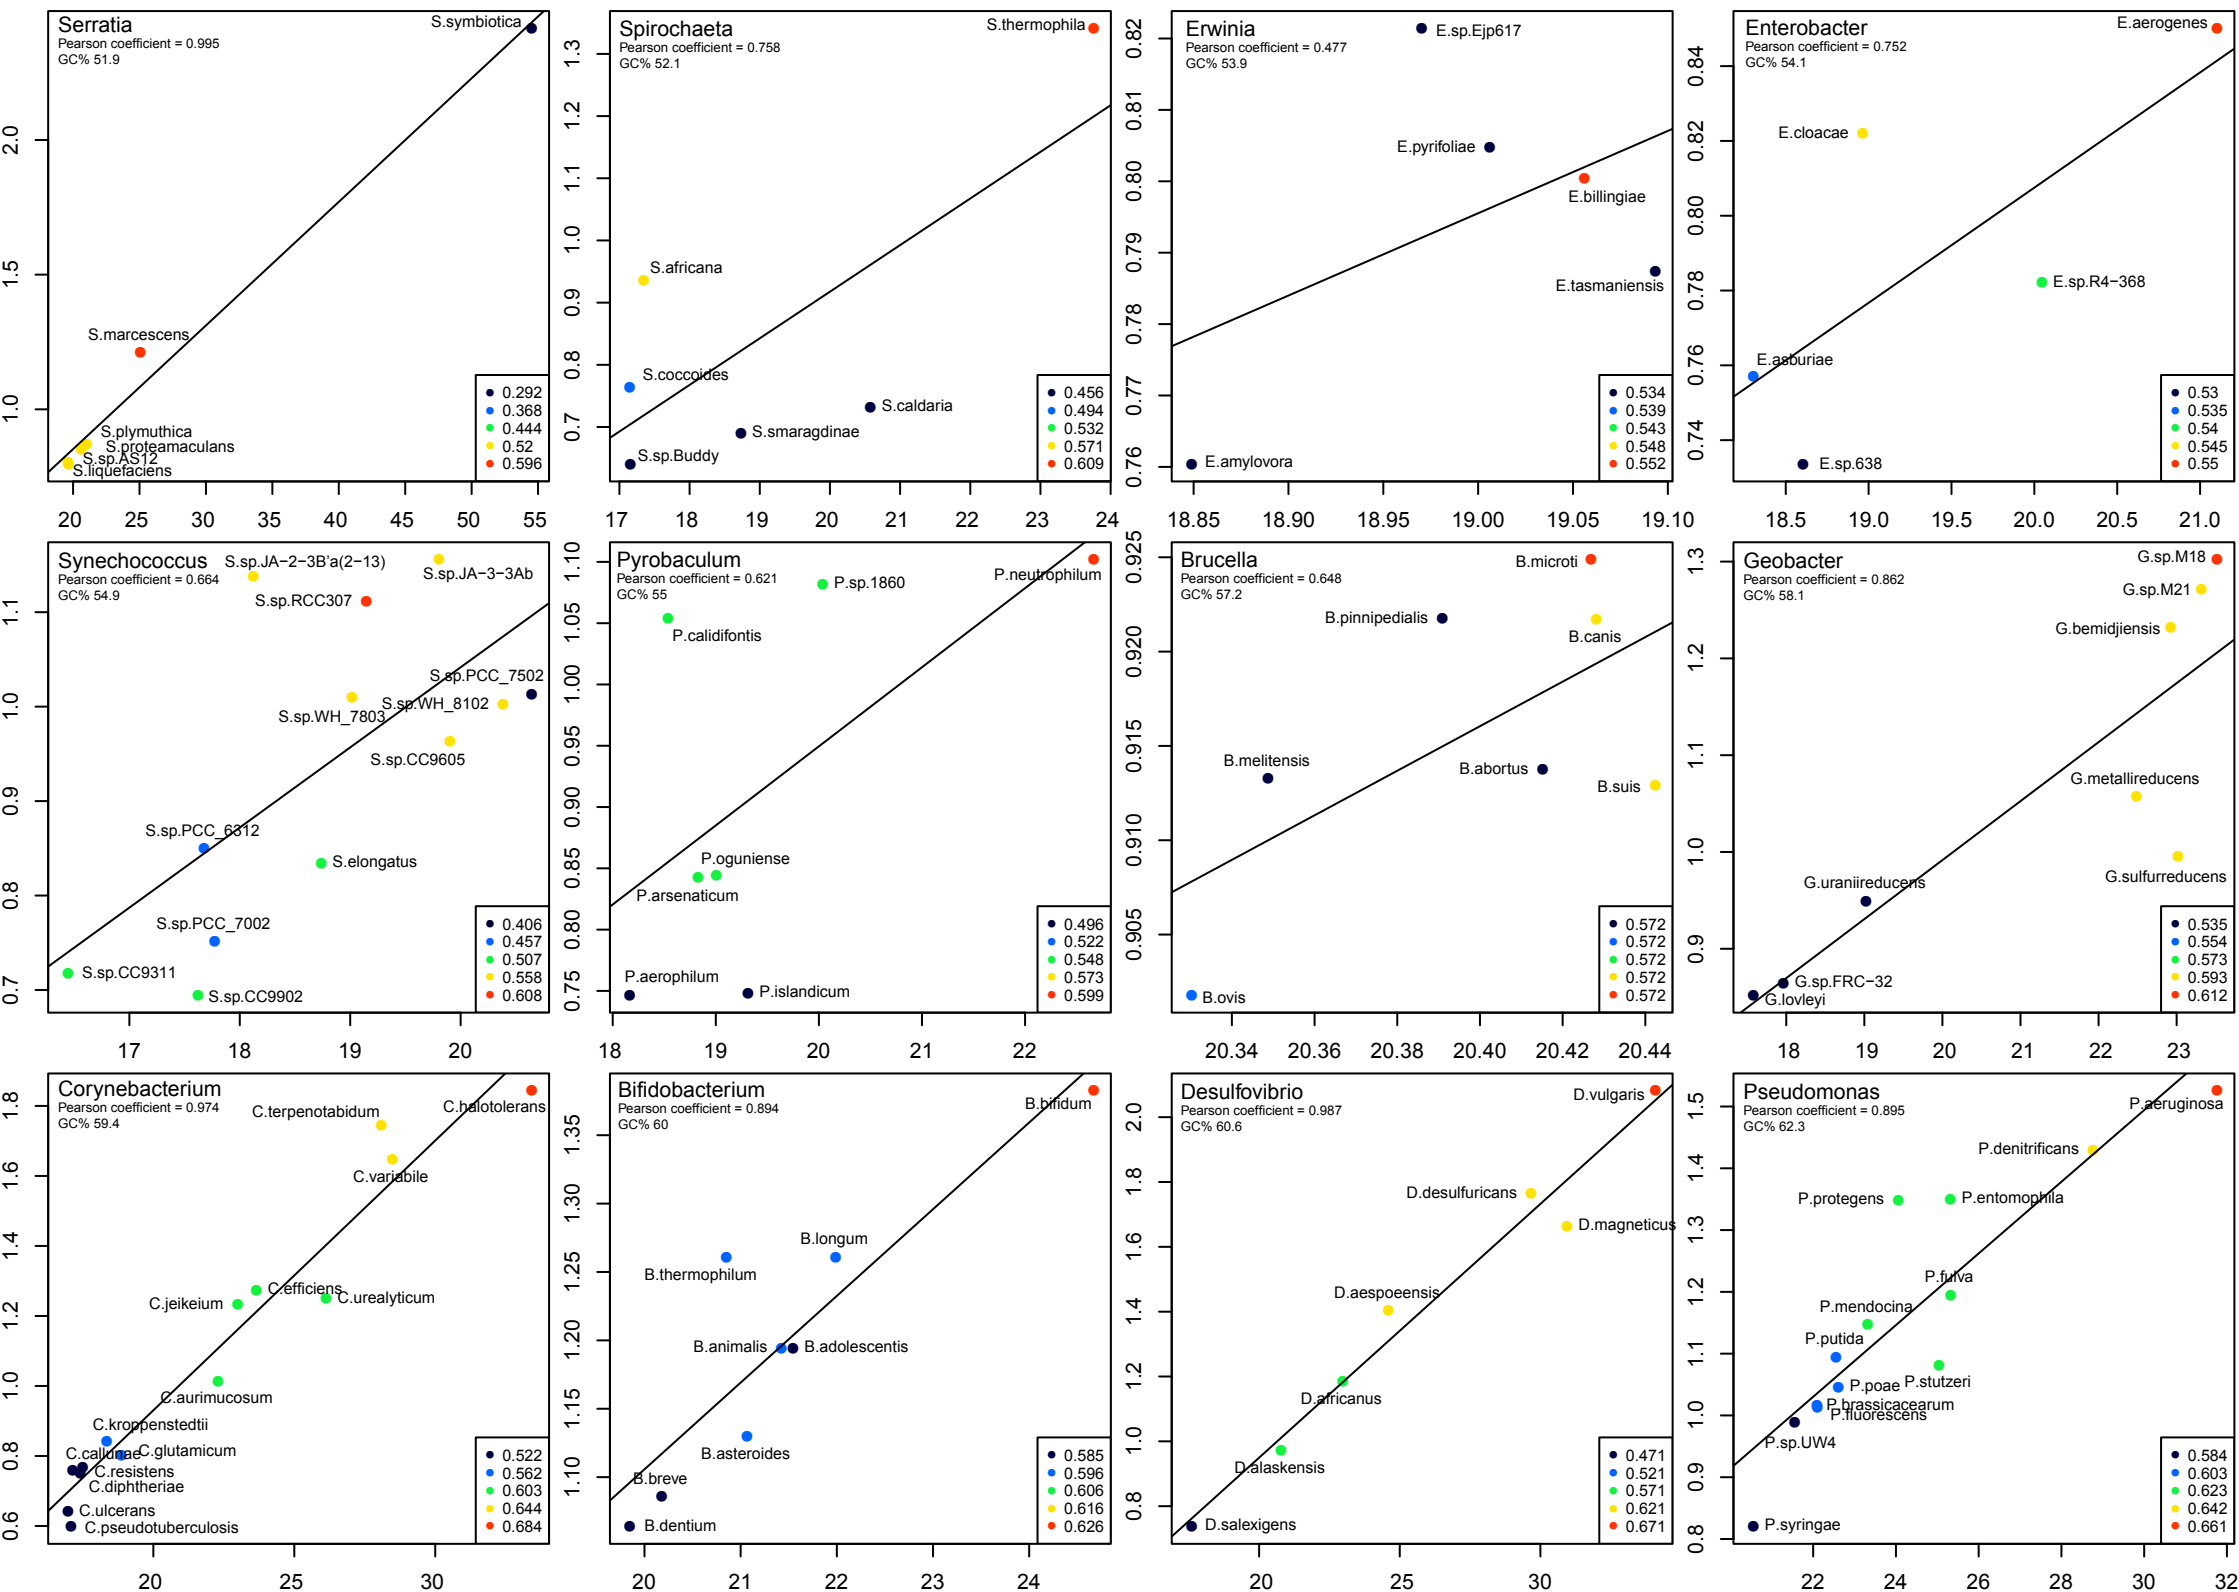

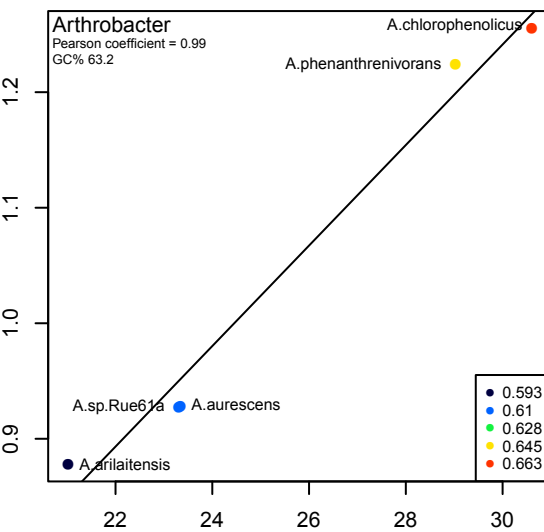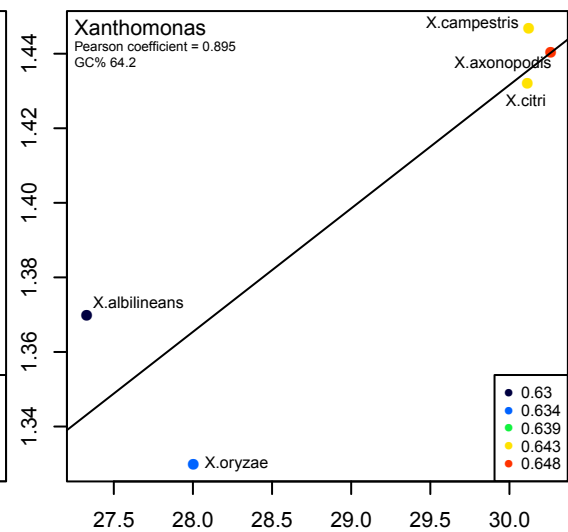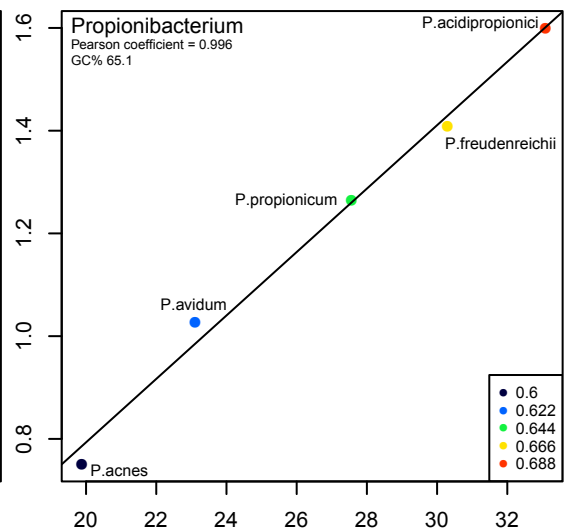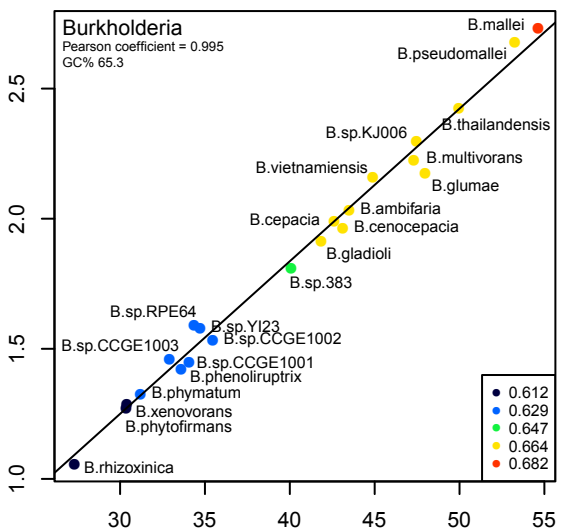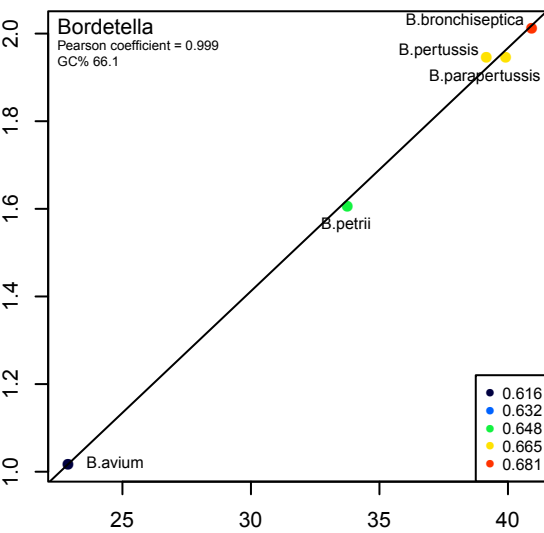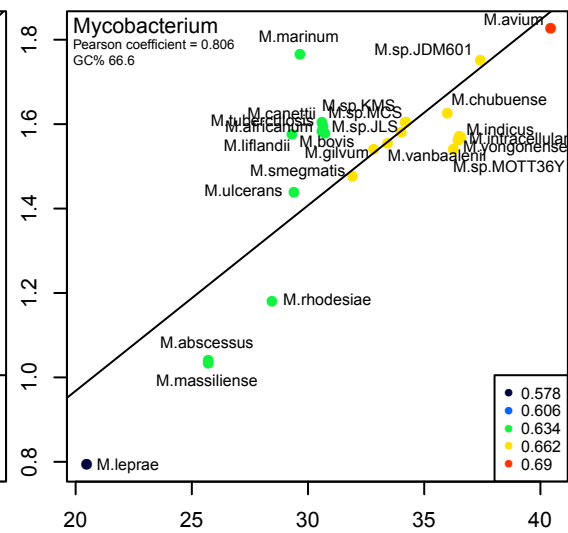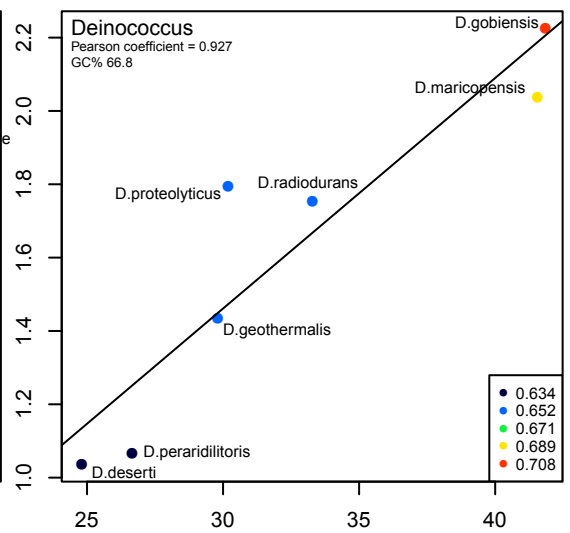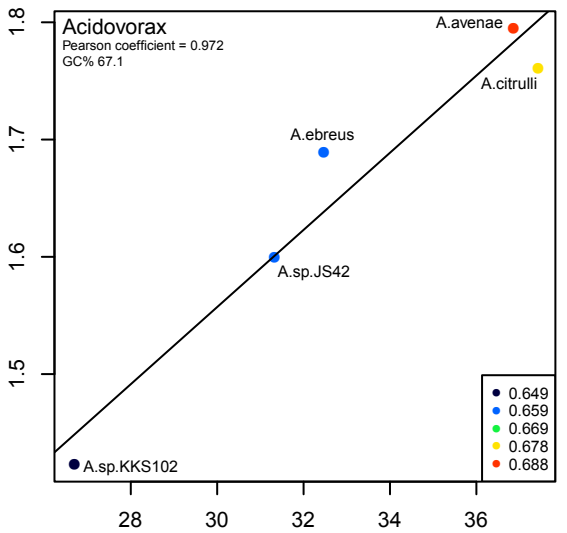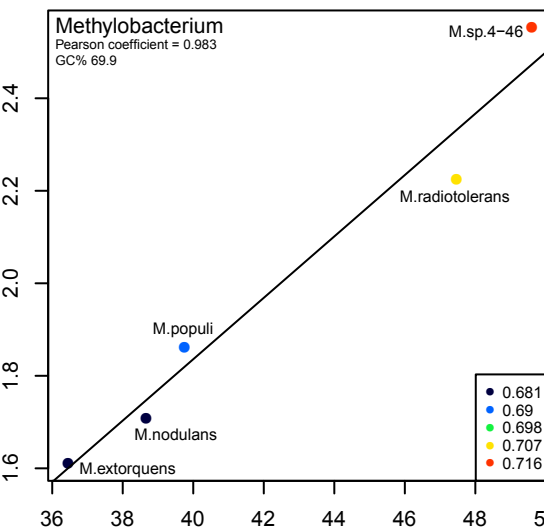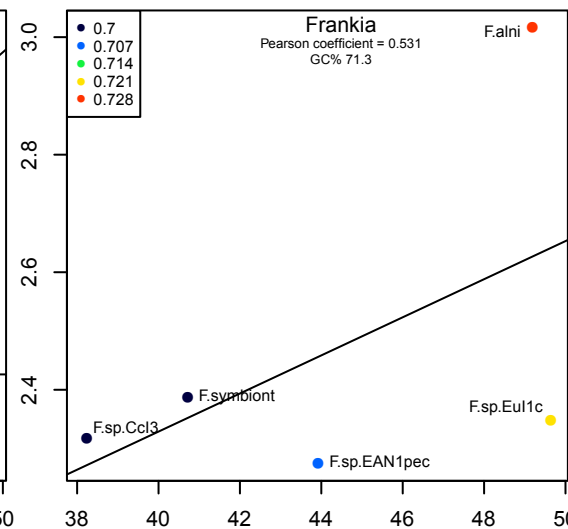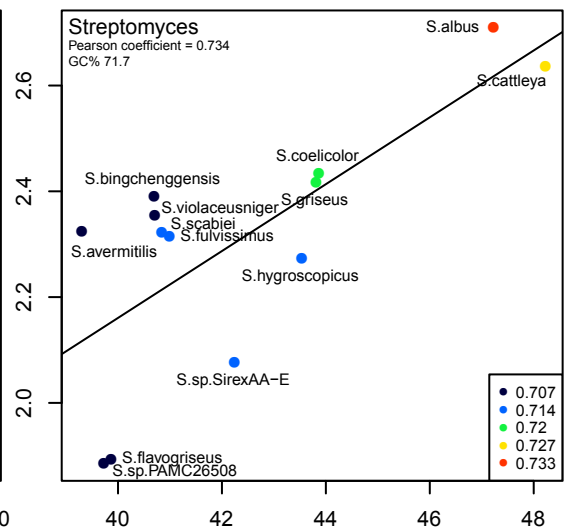

C. Direct repeats-TRs correlation in each bacterial genus



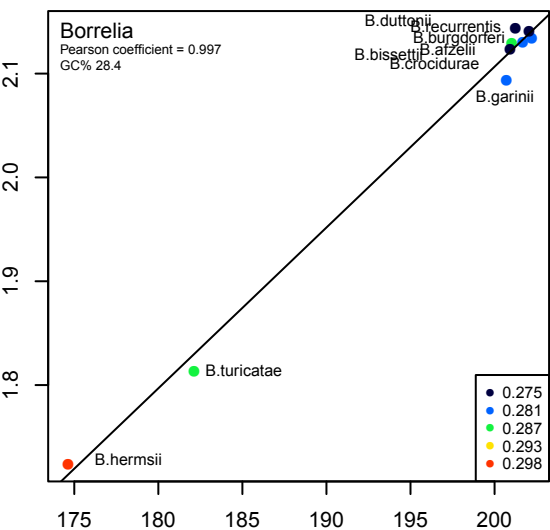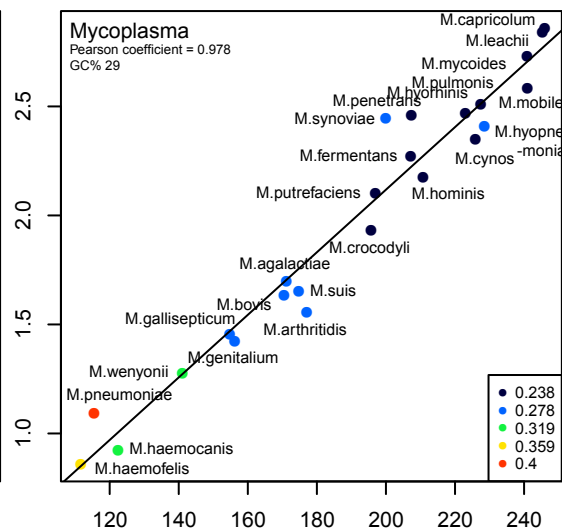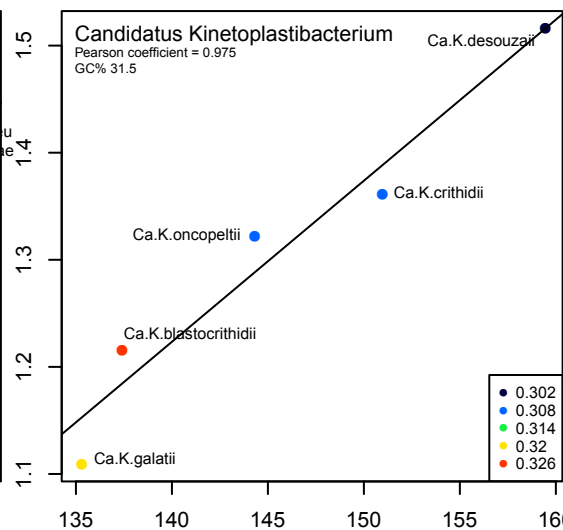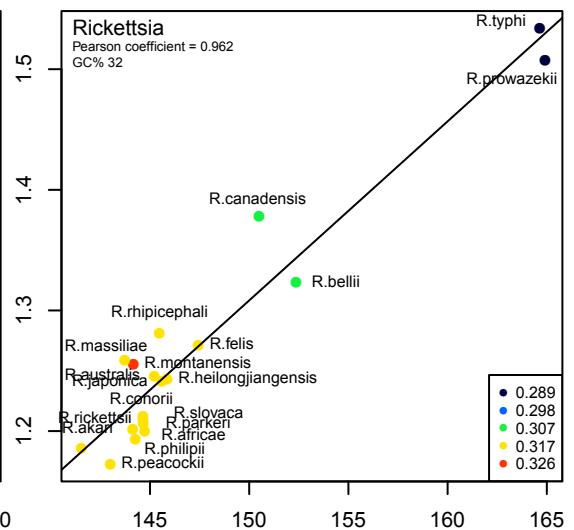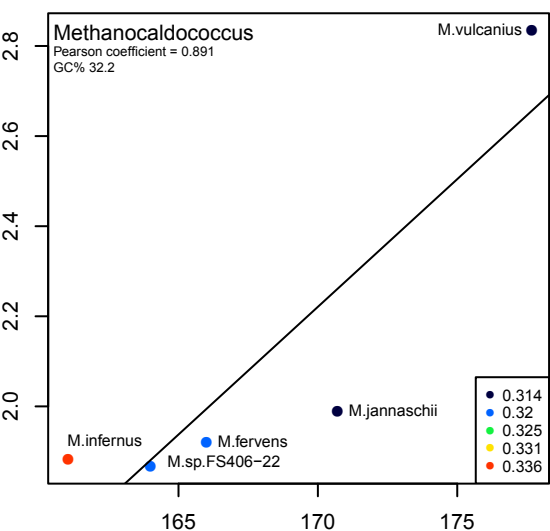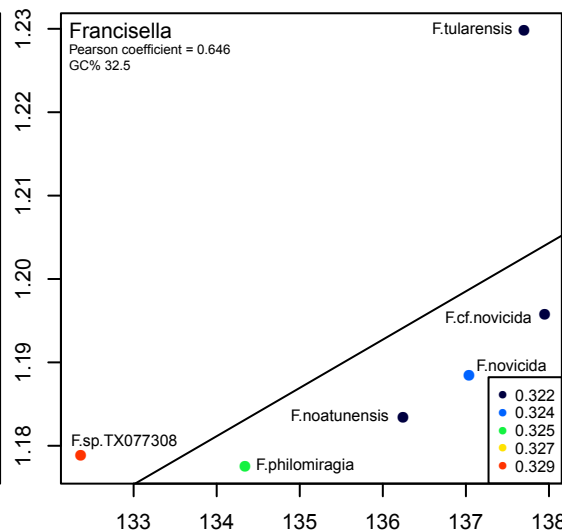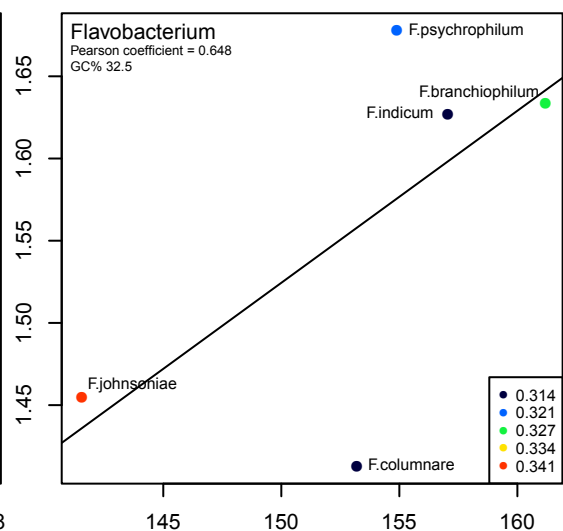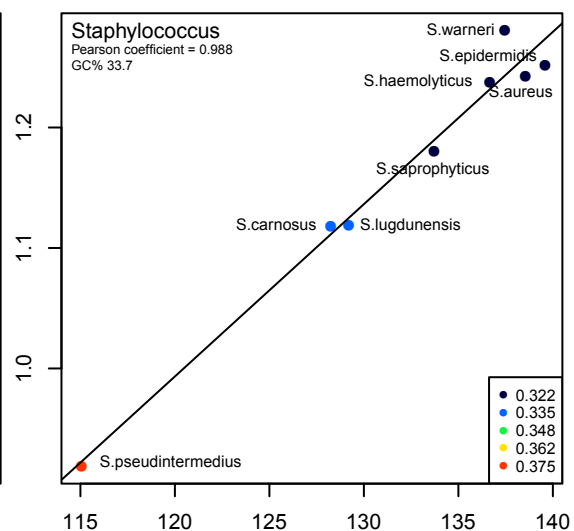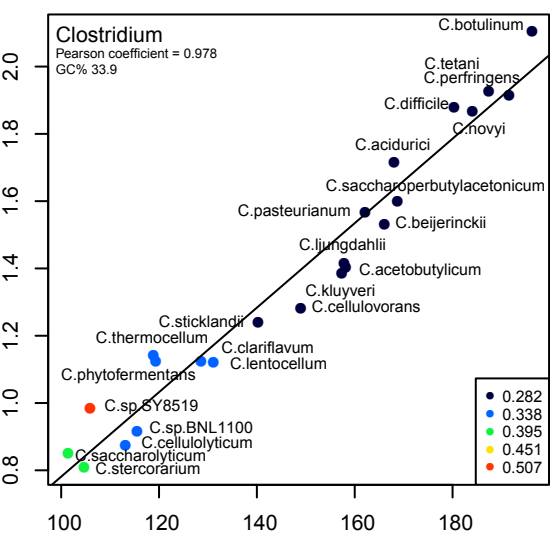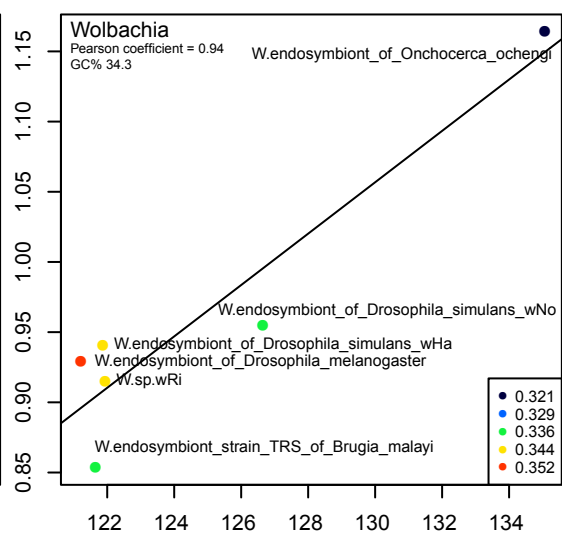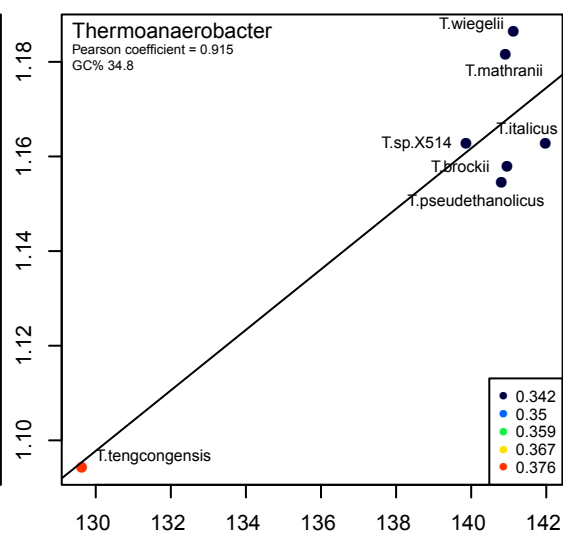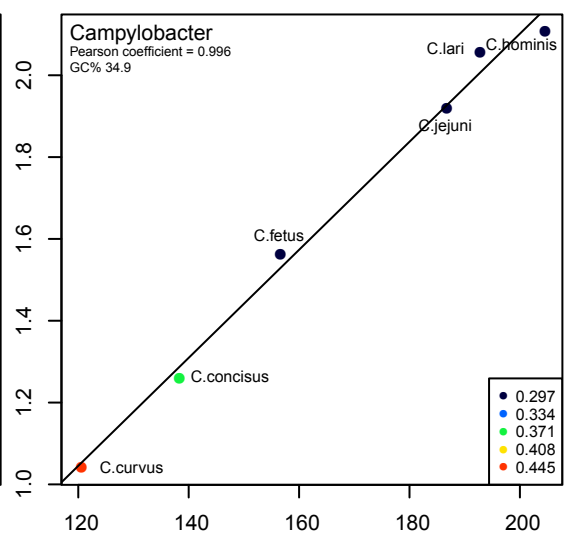

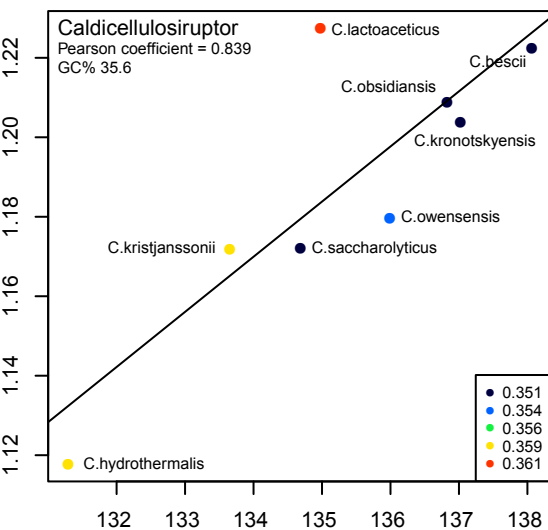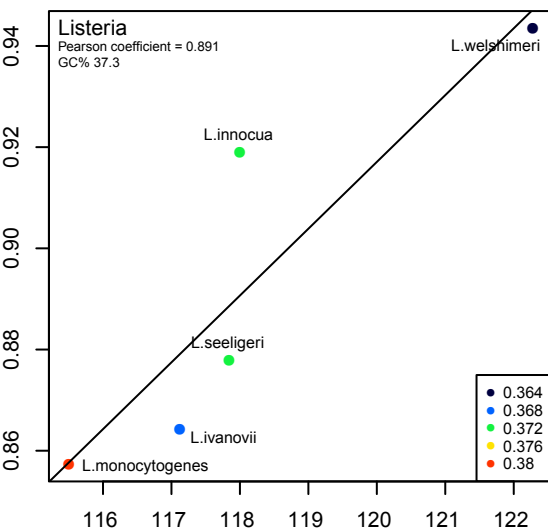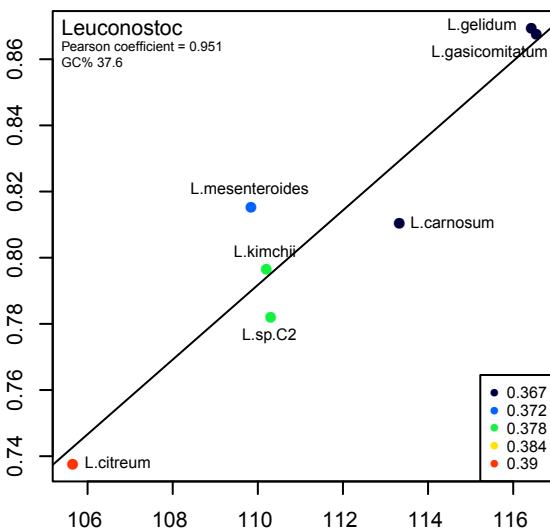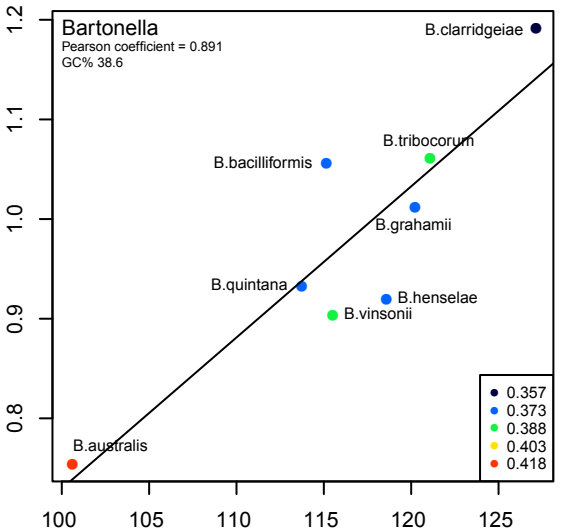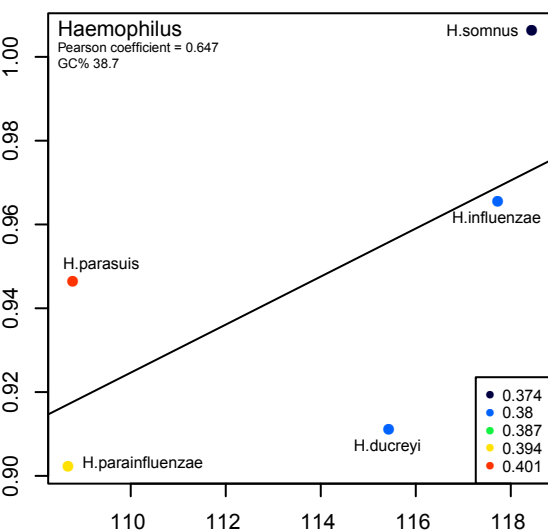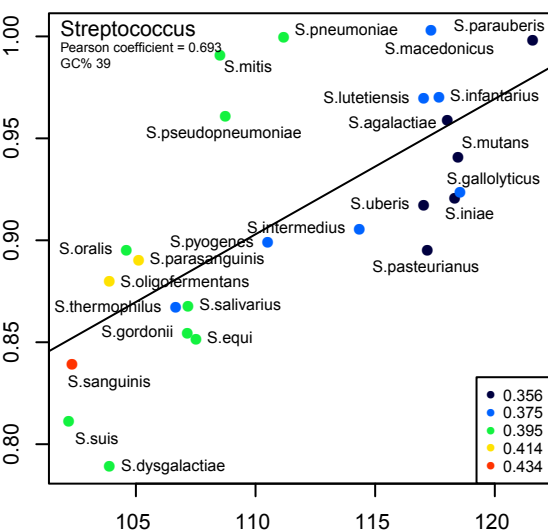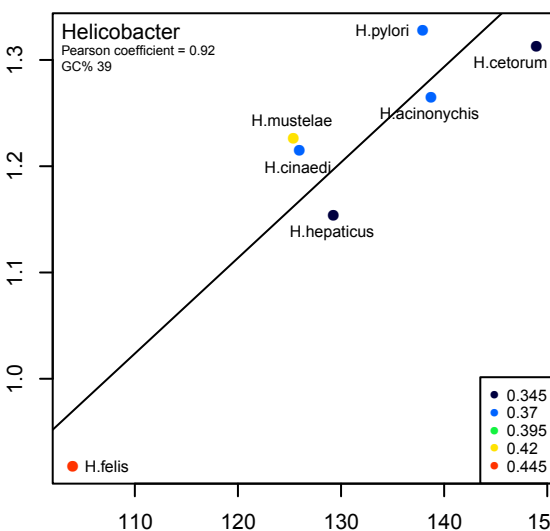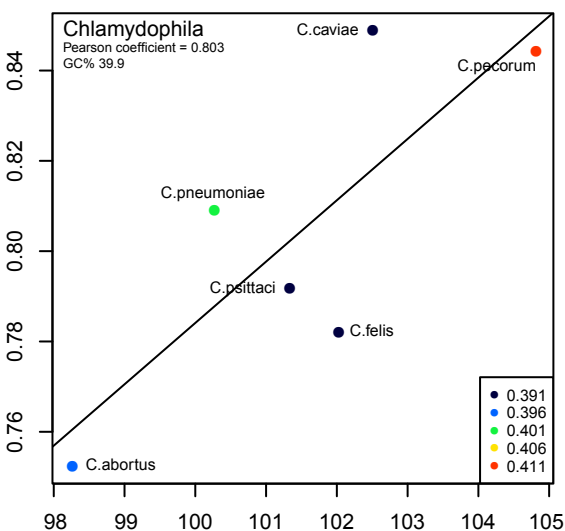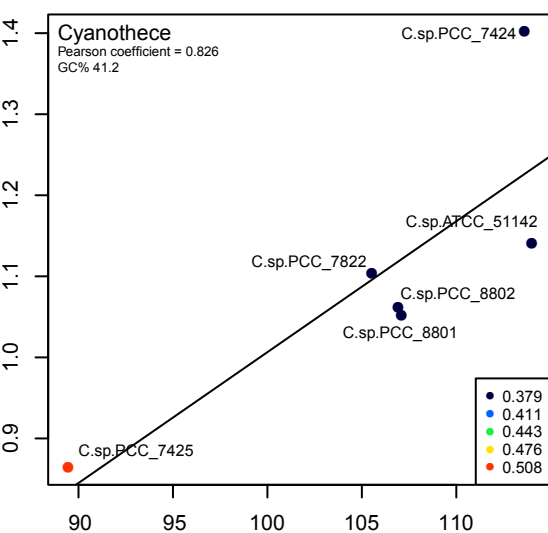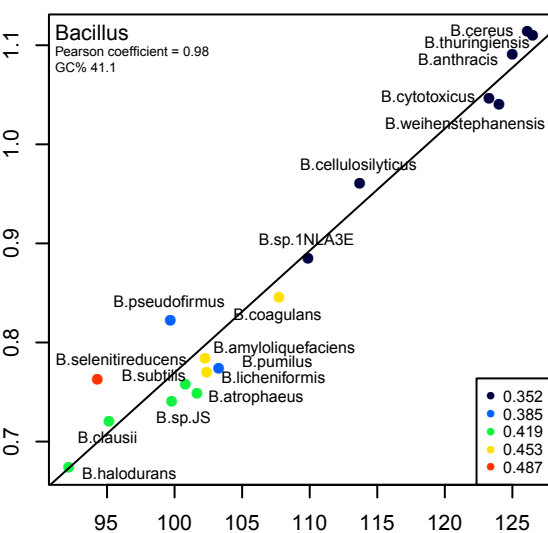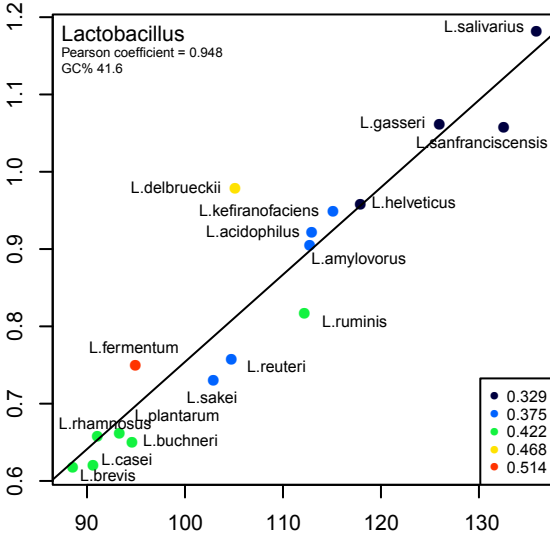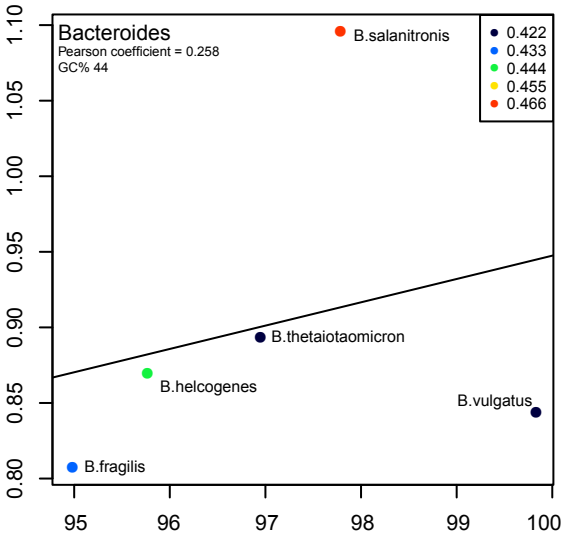

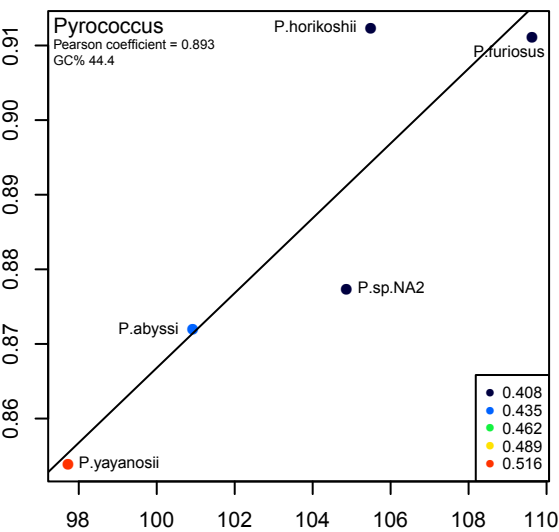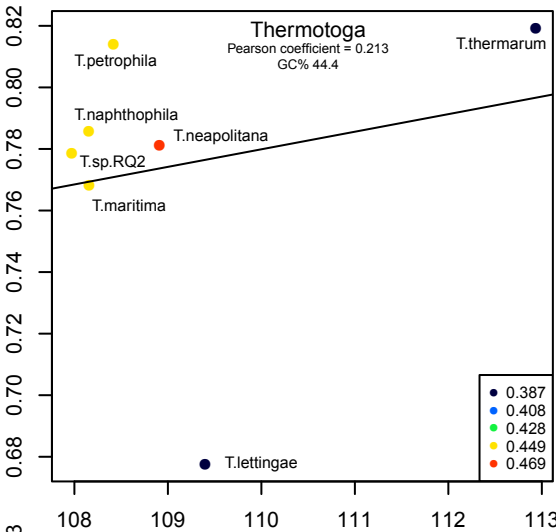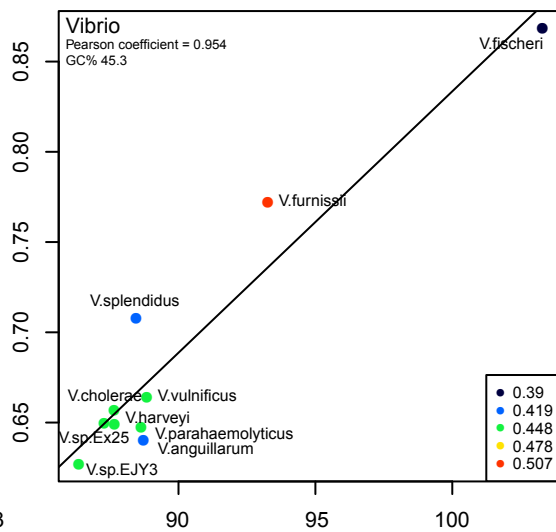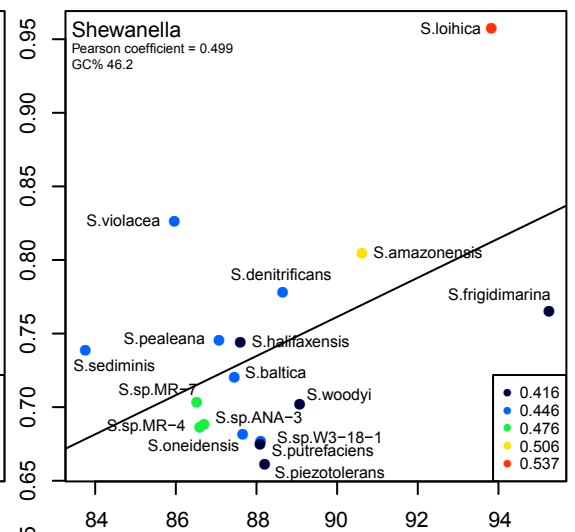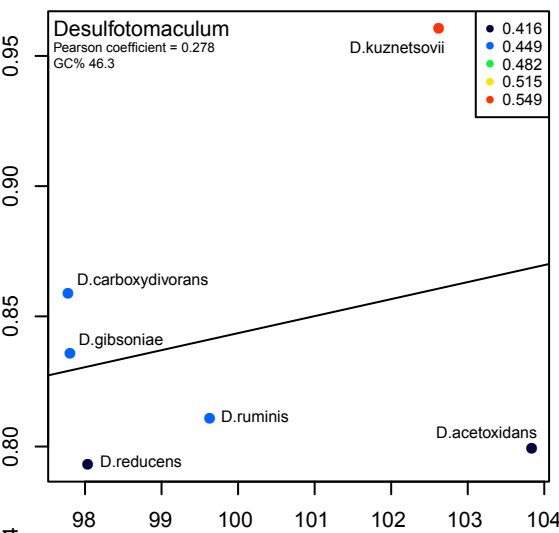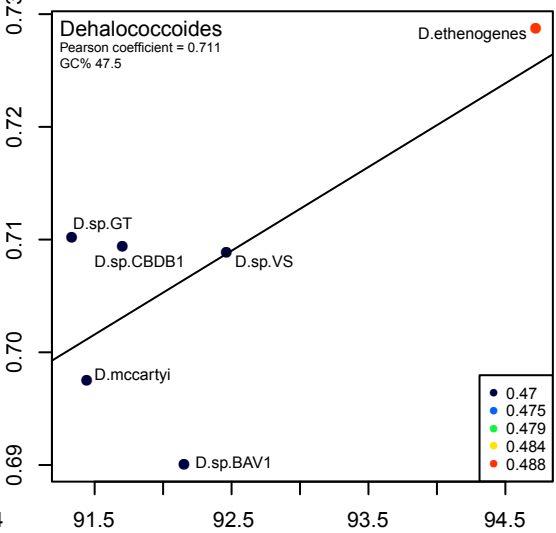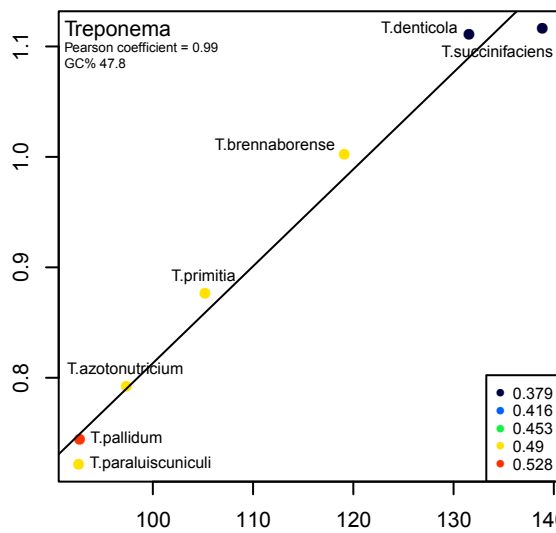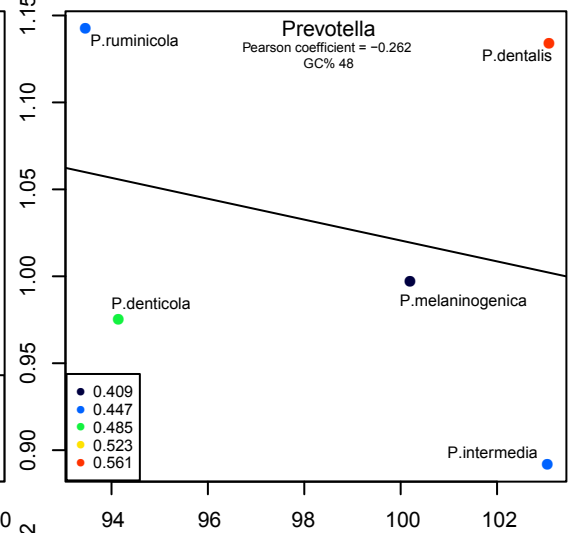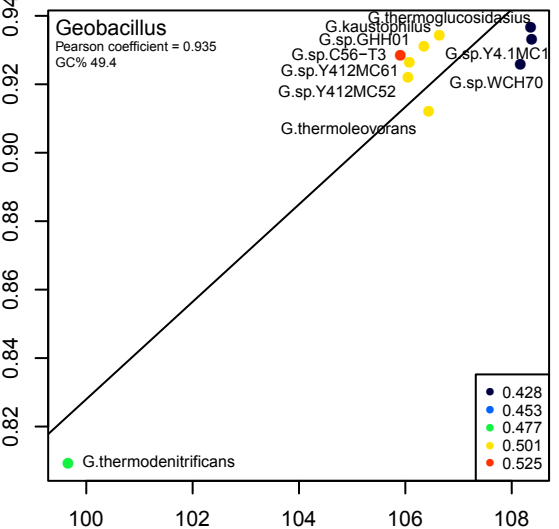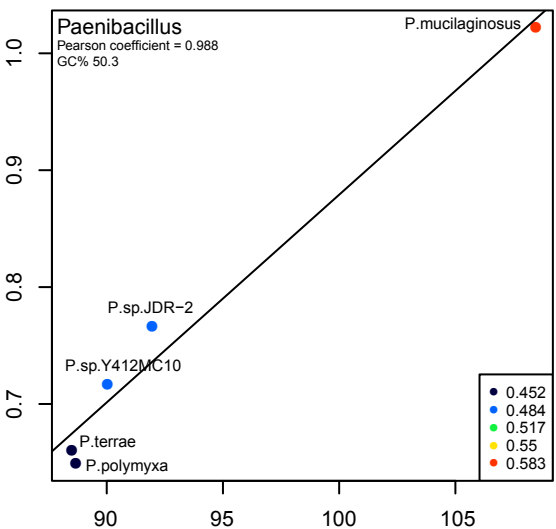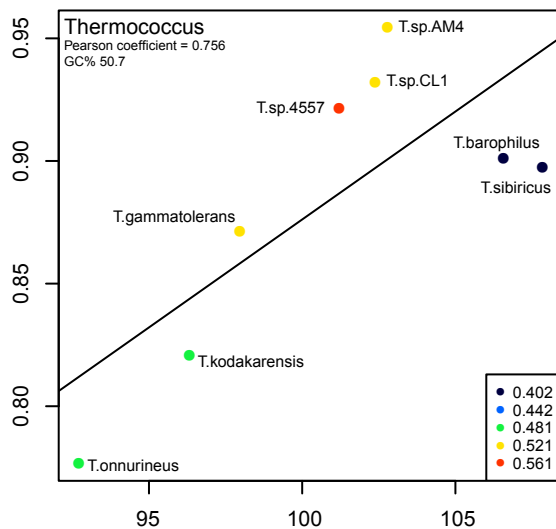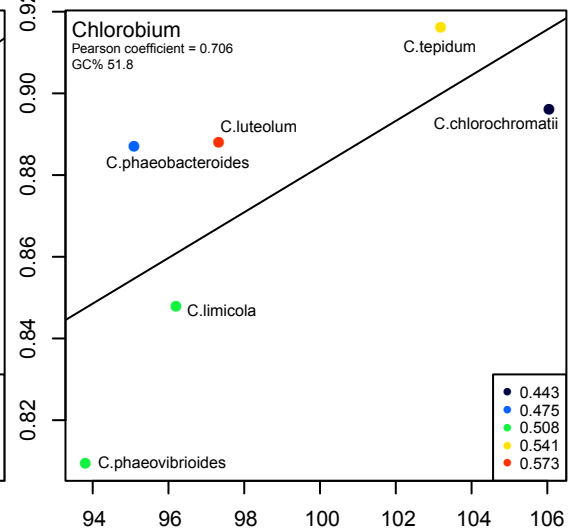

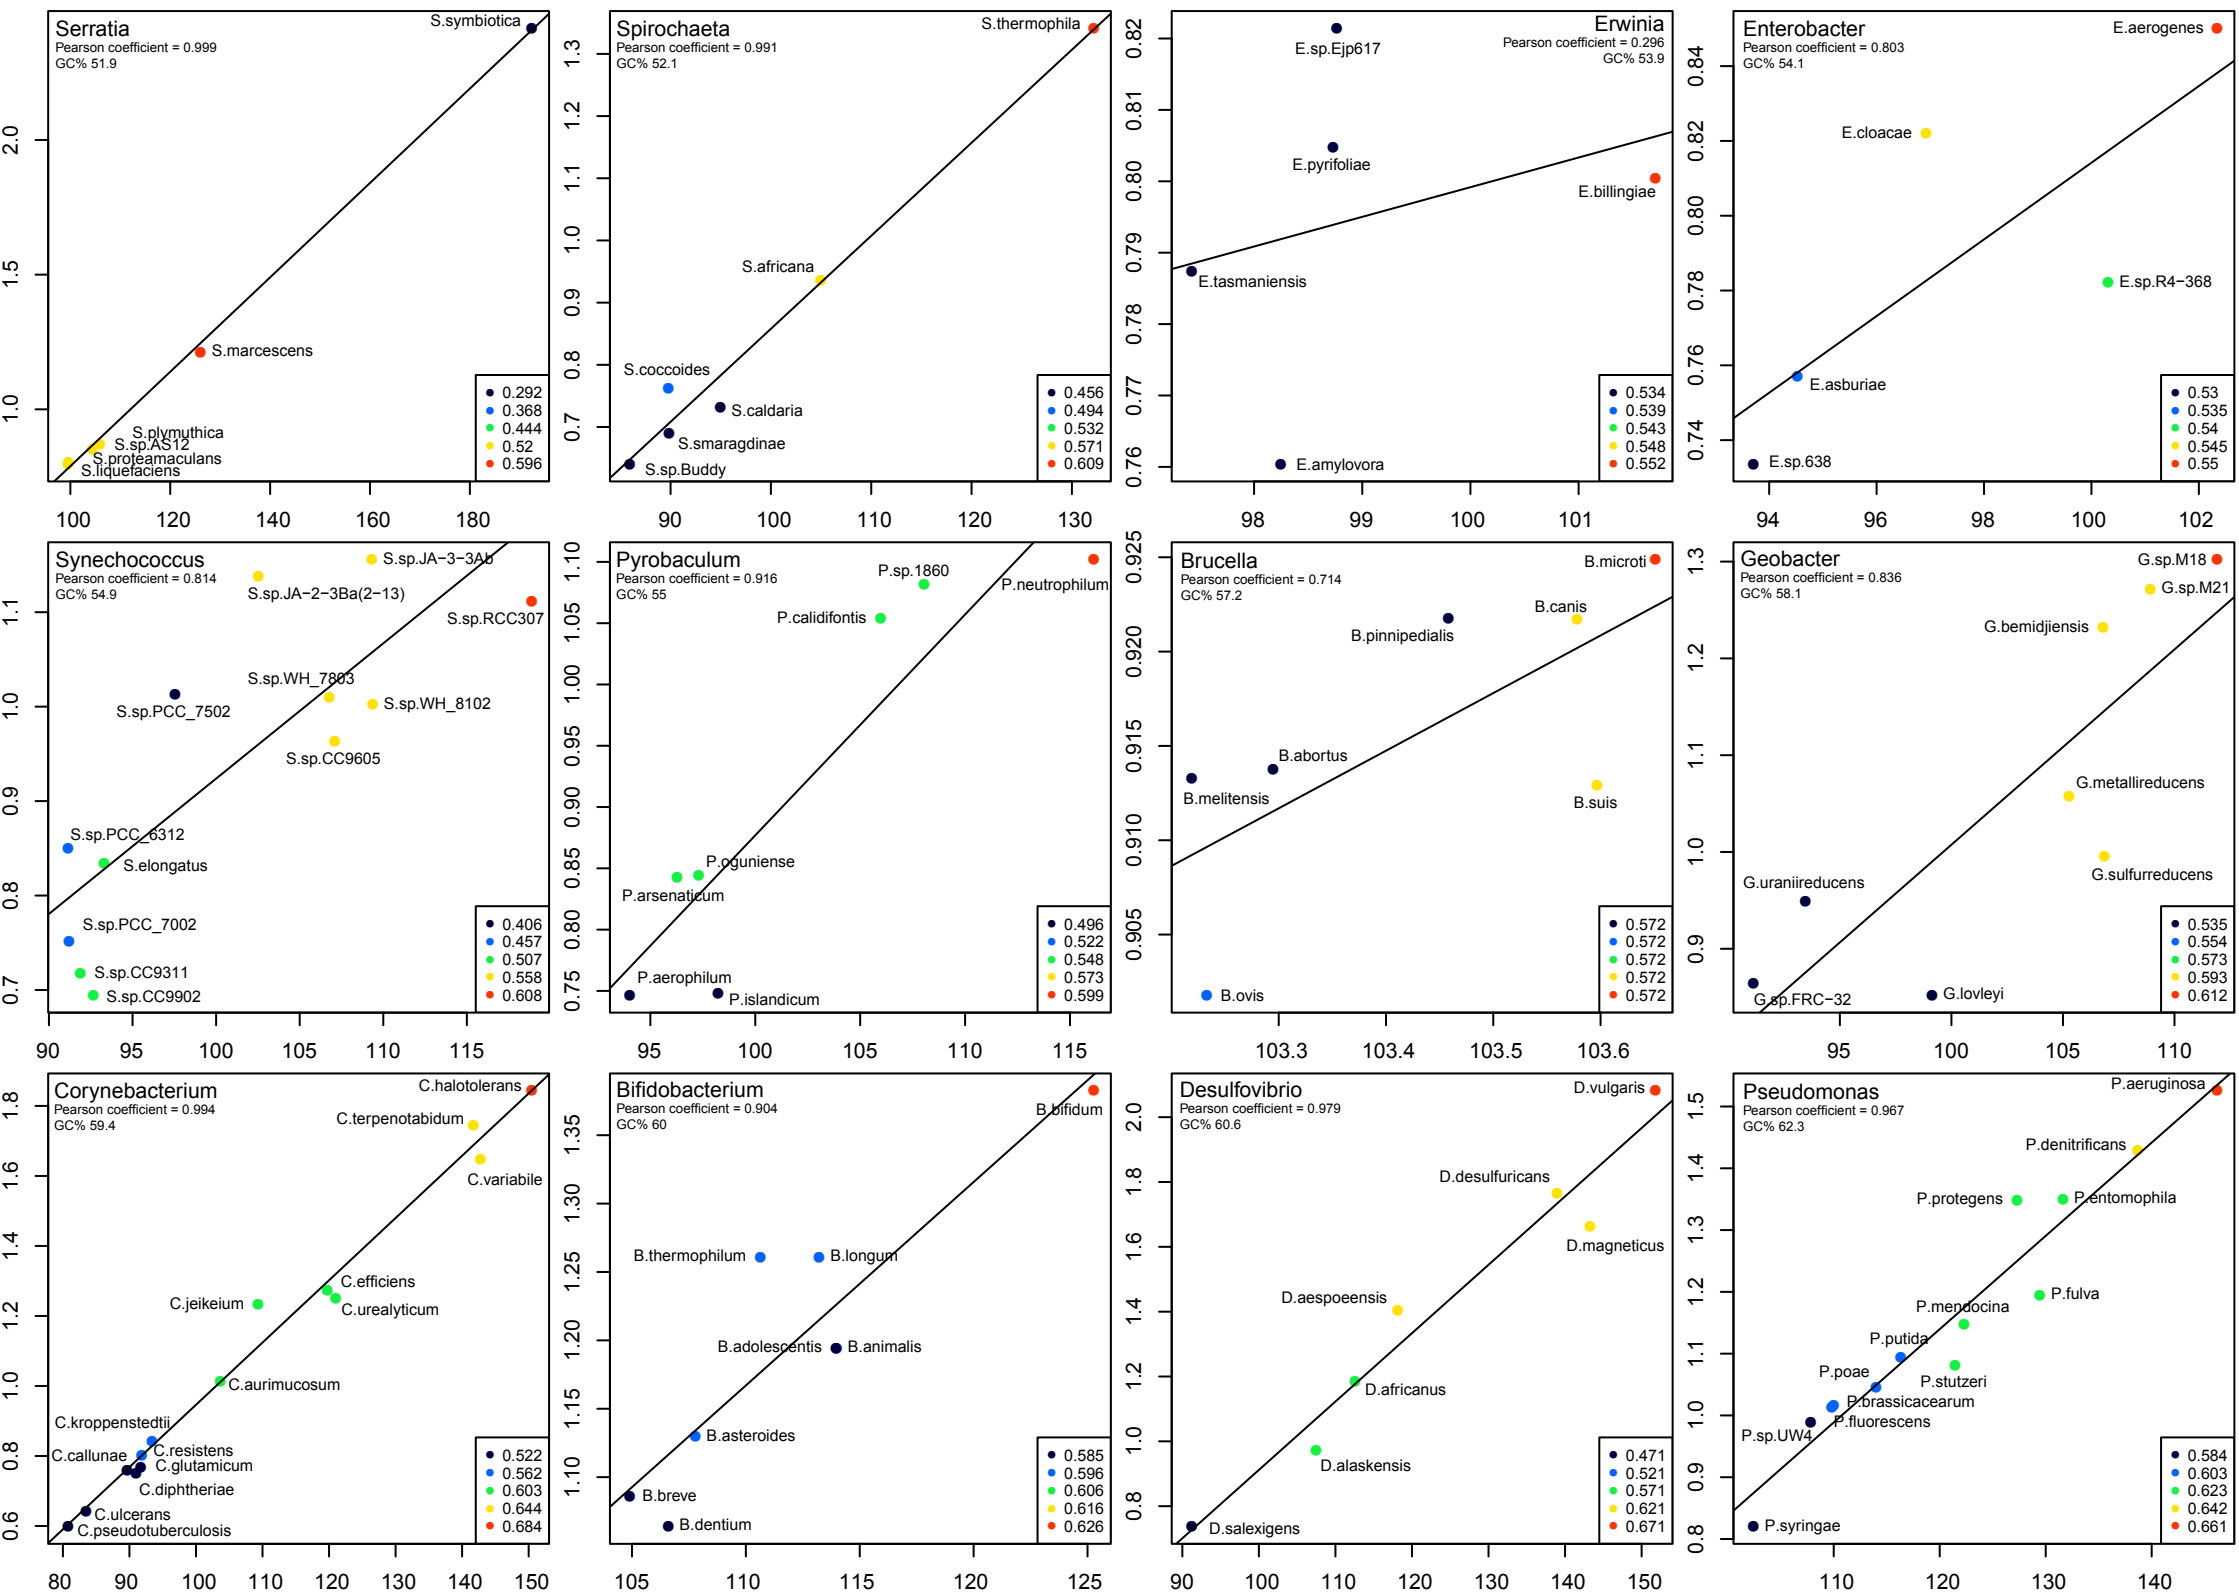

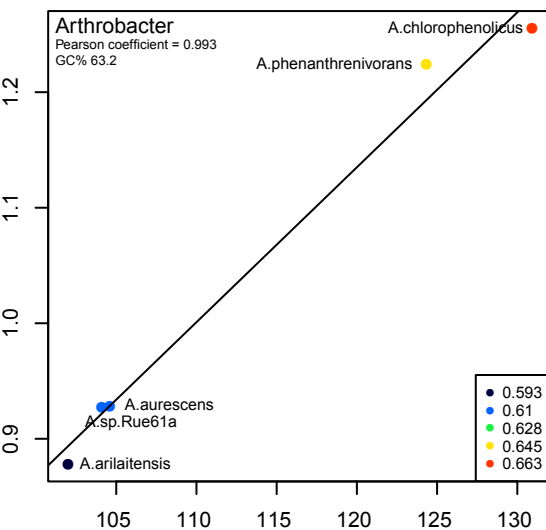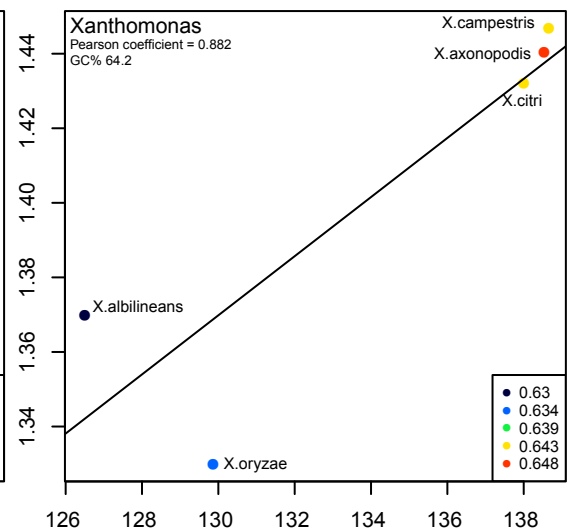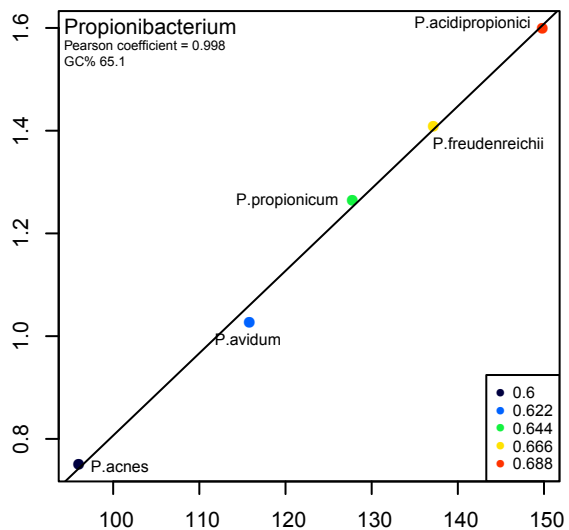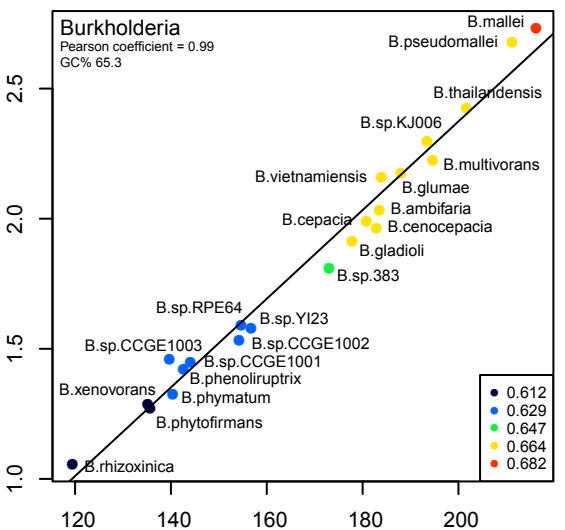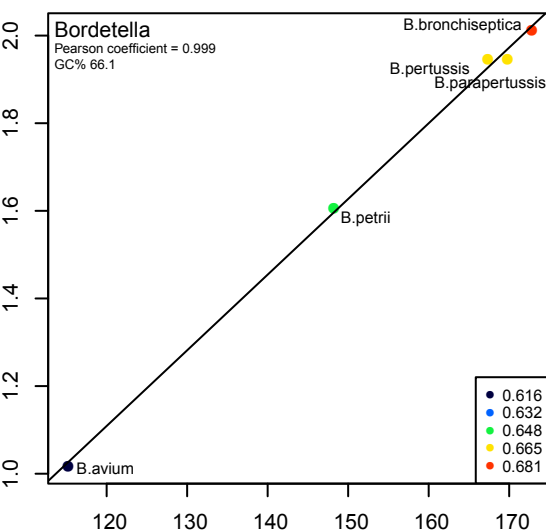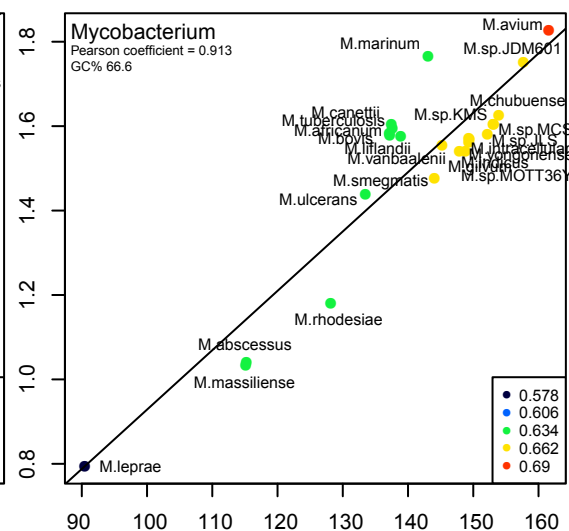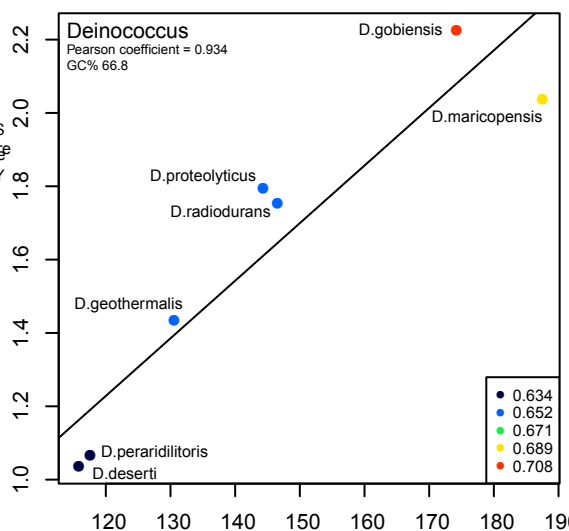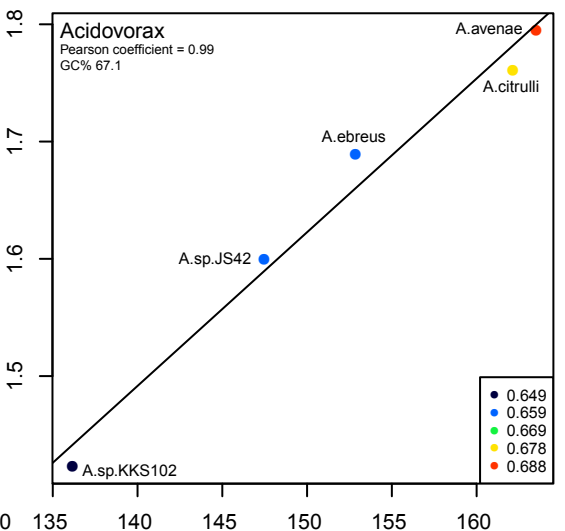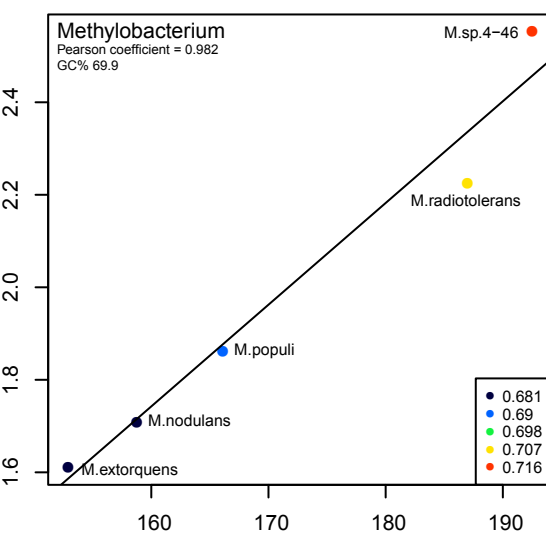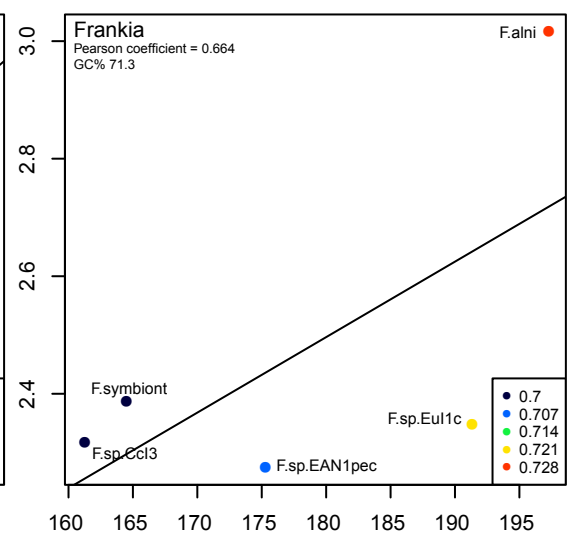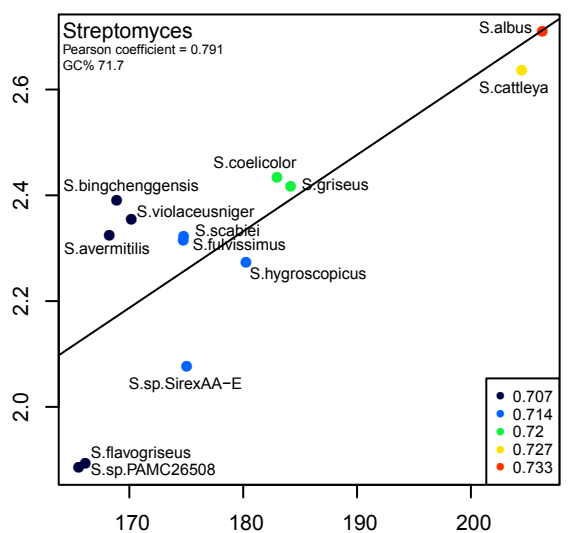

Supplement: pgen.1004640.s003.pdf [file pgen.1004640.s003.pdf]
