# Supplementary material for: The Tandem Repeats Enabling Reversible Switching between the Two Phases of β-Lactamase Substrate Spectrum
Source: PubMed Central journal article supplement (PMC4169377; doi:10.1371/journal.pgen.1004640), 2014-09-18

Figure S1. Local sequence duplication in the wild-type *penA* gene. The DNA sequences corresponding to the TRs listed in Fig. 1A are provided.

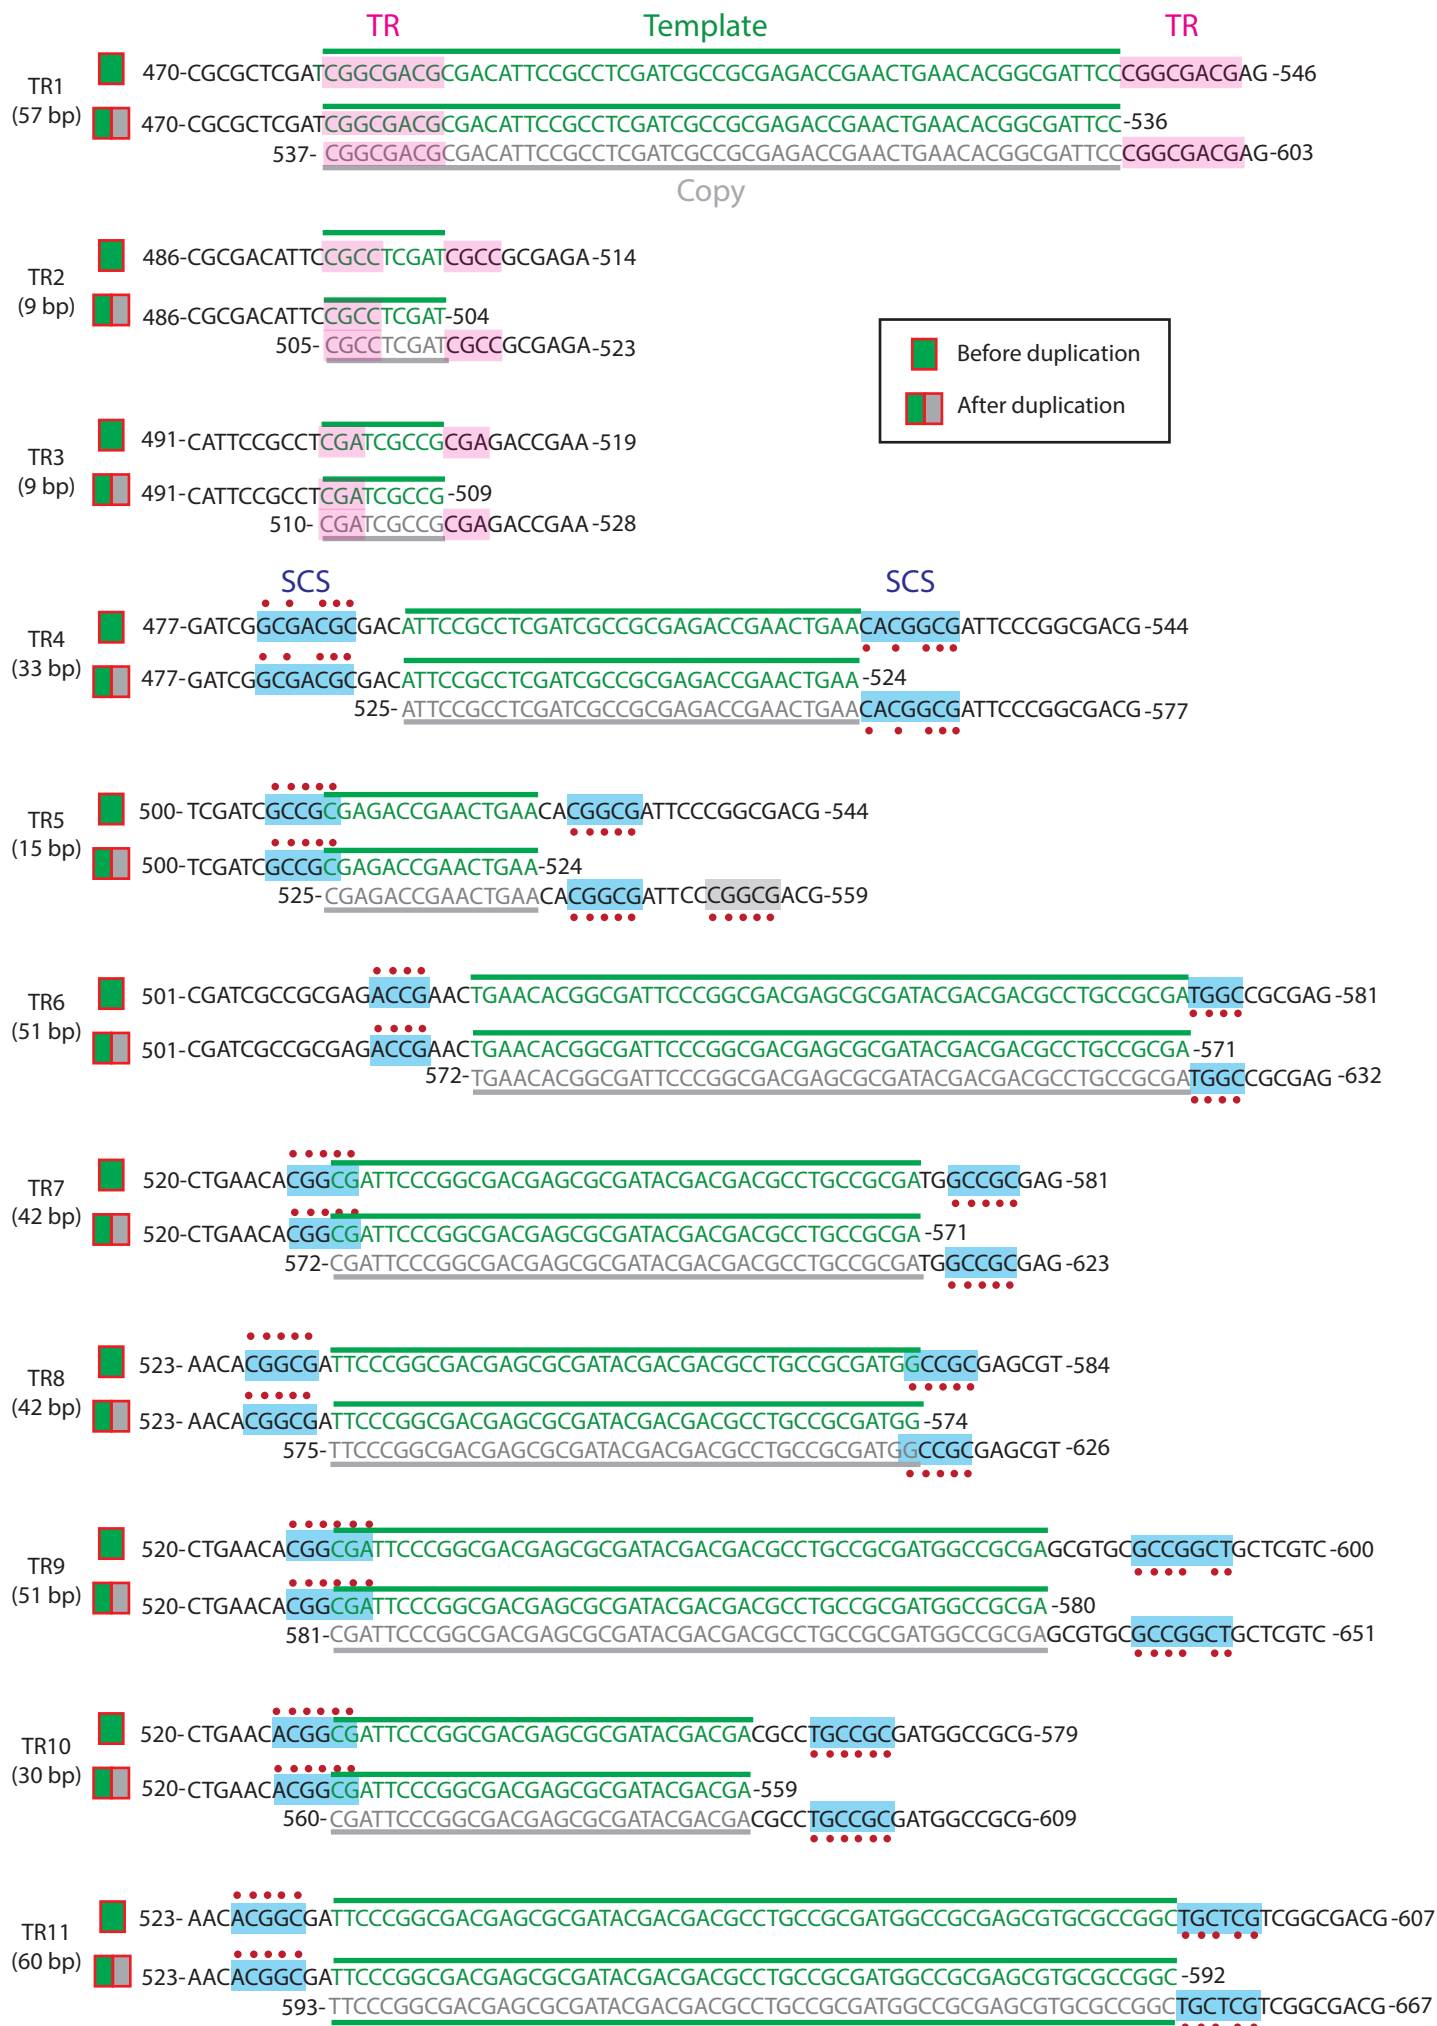

Supplement: pgen.1004640.s001.pdf [file pgen.1004640.s001.pdf]
